# Supplementary material for: Discovery of a Novel Chromone Enantiomer and the Precursors of Nonactic Acid from the Coral-Reef-Derived Streptomyces sp. SCSIO 66814
Source: MDPI journal article supplement (doi:10.3390/md22040181), 2024-04-17
Supplement: s1 [file s1]

# Discovery of a Novel Chromone Enantiomer and the Precursors of Nonactin Acid from the Coral-Reef-Derived *Streptomyces* sp. SCSIO

66814

Wenping Ding <sup>1,#</sup>, Yanqun Li <sup>1,#</sup>, Xingyu Li <sup>1</sup>, Jiajia Yin <sup>1</sup>, Songbiao Shi <sup>1</sup>, Xinpeng Tian <sup>1</sup>, Si Zhang <sup>1,2,\*</sup> and Hao Yin <sup>1,2,\*</sup>

<sup>1</sup> CAS Key Laboratory of Tropical Marine Bio-resources and Ecology, South China Sea Institute of Oceanology, Chinese Academy of Sciences, Guangzhou 510301, China

<sup>2</sup> Southern Marine Science and Engineering Guangdong Laboratory (Guangzhou), Guangzhou 511458, China

<sup>#</sup> These authors contributed equally to this work

## Corresponding authors

zhsimd@scsio.ac.cn (S.Z.)

yinhao@scsio.ac.cn (H.Y.)

## Contents

|                                                                                                                    |    |
|--------------------------------------------------------------------------------------------------------------------|----|
| General experimental procedure .....                                                                               | 3  |
| Calculated method.....                                                                                             | 3  |
| Figure S1. Chiral HPLC analysis profiles of compound 1 at 240nm .....                                              | 4  |
| Figure S2. Chiral HPLC analysis profiles of compound 2 at 230nm .....                                              | 5  |
| Figure S3. Chiral HPLC analysis profiles of compound 3 at 230nm .....                                              | 5  |
| Table S1. Predicted 57 biosynthetic gene clusters using antiSMASH with a “loose” detection strictness setting..... | 6  |
| Table S2. Predicted function of the open reading frames .....                                                      | 7  |
| Figure S4. Integrated cluster-node diagram of Molecular Networking .....                                           | 9  |
| Table S3. The chemical structures being annotated by GNPS.....                                                     | 9  |
| Figure S5. LC-MS/MS profiles at 37.8 min, 39.4 min, and 42.2 min .....                                             | 10 |
| Table S4. The three compounds being confirmed by LC-MS/MS.....                                                     | 10 |
| Figure S6. The MS/MS cleavage fragments from nonactin .....                                                        | 11 |
| Figure S7. HRESIMS spectrum of compound 1 .....                                                                    | 11 |
| Figure S8. <sup>1</sup> H NMR spectrum (CD <sub>3</sub> OD, 700 MHz) of compound 1 .....                           | 12 |
| Figure S9. <sup>13</sup> C NMR and DEPT spectra (CD <sub>3</sub> OD, 176 MHz) of compound 1 .....                  | 14 |
| Figure S10. HSQC spectrum of compound 1 .....                                                                      | 14 |
| Figure S11. HMBC spectrum of compound 1 .....                                                                      | 15 |

|                                                                                                          |    |
|----------------------------------------------------------------------------------------------------------|----|
| Figure S12. $^1\text{H}$ – $^1\text{H}$ COSY spectrum of compound 1 .....                                | 15 |
| Figure S13. UV spectrum of compound 1 .....                                                              | 16 |
| Figure S14. IR spectrum of compound 1 .....                                                              | 16 |
| Figure S15. CD spectrum of compound 1a .....                                                             | 17 |
| Figure S16. CD spectrum of compound 1b .....                                                             | 17 |
| Figure S17. HRESIMS spectrum of compound 2 .....                                                         | 18 |
| Figure S18. $^1\text{H}$ NMR spectrum ( $\text{CD}_3\text{OD}$ , 700 MHz) of compound 2 .....            | 18 |
| Figure S19. $^{13}\text{C}$ NMR and DEPT spectra ( $\text{CD}_3\text{OD}$ , 176 MHz) of compound 2 ..... | 20 |
| Figure S20. HSQC spectrum of compound 2 .....                                                            | 21 |
| Figure S21. HMBC spectrum of compound 2 .....                                                            | 21 |
| Figure S22. $^1\text{H}$ – $^1\text{H}$ COSY spectrum of compound 2 .....                                | 22 |
| Figure S23. NOESY spectrum of compound 2 .....                                                           | 22 |
| Figure S24. UV spectrum of compound 2 .....                                                              | 23 |
| Figure S25. IR spectrum of compound 2 .....                                                              | 23 |
| Figure S26. CD spectrum of compound 2a .....                                                             | 24 |
| Figure S27. HRESIMS spectrum of compound 3 .....                                                         | 24 |
| Figure S28. $^1\text{H}$ NMR spectrum ( $\text{CD}_3\text{OD}$ , 700 MHz) of compound 3 .....            | 25 |
| Figure S29. $^{13}\text{C}$ NMR and DEPT spectra ( $\text{CD}_3\text{OD}$ , 176 MHz) of compound 3 ..... | 26 |
| Figure S30. HSQC spectrum of compound 3 .....                                                            | 27 |
| Figure S31. HMBC spectrum of compound 3 .....                                                            | 27 |
| Figure S32. $^1\text{H}$ – $^1\text{H}$ COSY spectrum of compound 3 .....                                | 28 |
| Figure S33. NOESY spectrum of compound 3 .....                                                           | 28 |
| Figure S34. UV spectrum of compound 3 .....                                                              | 29 |
| Figure S35. IR spectrum of compound 3 .....                                                              | 29 |
| Figure S36. CD spectrum of compound 3a .....                                                             | 30 |
| Figure S37. CD spectrum of compound 3b .....                                                             | 30 |
| Figure S38. HRESIMS spectrum of compound 4 .....                                                         | 31 |
| Figure S39. $^1\text{H}$ NMR spectrum ( $\text{CD}_3\text{OD}$ , 500 MHz) of compound 4 .....            | 31 |
| Figure S40. $^{13}\text{C}$ NMR and DEPT spectra ( $\text{CD}_3\text{OD}$ , 126 MHz) of compound 4 ..... | 33 |
| Figure S41. HSQC spectrum of compound 4 .....                                                            | 33 |
| Figure S42. HMBC spectrum of compound 4 .....                                                            | 34 |
| Figure S43. $^1\text{H}$ – $^1\text{H}$ COSY spectrum of compound 4 .....                                | 34 |

|                                                                                                    |    |
|----------------------------------------------------------------------------------------------------|----|
| Figure S44. NOESY spectrum of compound 4 .....                                                     | 35 |
| Figure S45. UV spectrum of compound 4 .....                                                        | 35 |
| Figure S46. IR spectrum of compound 4 .....                                                        | 36 |
| Figure S47. ESIMS spectrum of compound 5 .....                                                     | 36 |
| Figure S48. <sup>1</sup> H NMR spectrum (CDCl <sub>3</sub> , 500 MHz) of compound 5 .....          | 37 |
| Figure S49. <sup>13</sup> C NMR and DEPT spectra (CDCl <sub>3</sub> , 126 MHz) of compound 5 ..... | 38 |
| Figure S50. CD spectrum of compound 5 .....                                                        | 39 |
| Figure S51. ESIMS spectrum of compound 6 .....                                                     | 39 |
| Figure S52. <sup>1</sup> H NMR spectrum (CD <sub>3</sub> OD, 700 MHz) of compound 6 .....          | 40 |
| Figure S53. <sup>13</sup> C NMR and DEPT spectra (CD <sub>3</sub> OD, 176 MHz) of compound 6 ..... | 41 |
| Figure S54. ESIMS spectrum of compound 7 .....                                                     | 42 |
| Figure S55. <sup>1</sup> H NMR spectrum (CD <sub>3</sub> OD, 700 MHz) of compound 7 .....          | 42 |
| Figure S56. <sup>13</sup> C NMR and DEPT spectra (CD <sub>3</sub> OD, 176 MHz) of compound 7 ..... | 44 |
| Calculated the specific rotations of 2a and 2b .....                                               | 44 |

## General experimental procedure

Column chromatography (CC): Claricep Flash C-18 Column (20–40 μm, Agela Technologies, Tianjin, China), Sephadex LH-20 (100–200 μm, Pharmacia, Uppsala, Sweden). HRESIMS was measured on a Bruker maXis quadrupole-time-of-flight mass spectrometer (Bruker, Billerica, USA). UV spectra were run on a UV-2600 spectrophotometer (Shimadzu, Kyoto, Japan). IR Spectra were performed on an IR Affinity-1 spectrometer (Shimadzu, Kyoto, Japan). 1D and 2D NMR spectra were recorded on Bruker AV500 or Bruker AVANCE III HD 700 MHz digital NMR spectrometer (Bruker Switzerland AG, Billerica, MA, USA) using TMS as the internal standard. MPLC (CHEETAH MP 200, Agela Technologies, Tianjin, China) was equipped with Flash C-18 Column (Agela Technologies, Tianjin, China). HPLC (Agilent 1260) was equipped with YMC-Pack ODS-A (250 × 4.6 mm or 250 × 10.0 mm, 5 μm, YMC, Ishikawa-ken, Japan) column, YMC-Pack Ph (250 × 4.6 mm or 250 × 10.0 mm, 5 μm, YMC, Ishikawa-ken, Japan) column. Fractions were monitored by thin layer chromatography, and spots were visualized by UV light (254 nm and 365 nm) and by smoking silica gel plates with iodine. All solvents used in CC and HPLC were of analytical grade (Tianjin Damao Chemical Plant, Tianjin, China) and chromatographic grade (MREDA), respectively.

## Calculated method

The conformational search was implemented in xtb software package using molecular dynamic simulations with the method of 100 ps/400 K/GNF0.<sup>1</sup> The obtained 2000 conformers were sequentially optimized on with semi-empirical level of GNF0-xTB

and GNF2-xTB, and the conformers were sorted by Molclus 1.9.9.9 program.<sup>2</sup> The conformers within an energy window of 5 kcal/mol were subjected to further re-optimization and frequency calculations using the DFT method at B3LYP-D3(BJ)/6-31G\* (IEFPCM, MeOH) level of theory. The specific rotation was calculated at 589 nm using B3LYP/6-311++G\*\* (IEFPCM, MeOH) level of theory. The contribution of each conformer was weighted using Boltzmann averaging. All calculations were performed using Gaussian 16 program.

## Reference

1. Grimme, S. Exploration of chemical compound, conformer, and reaction space with metadynamics simulations based on tight-binding quantum chemical calculations. *J. Chem. Theory Comput.* **2019**, 15 (5), 2847-2862.
2. Lu, T. Molclus program, Version 1.9.9.9, <http://www.keinsci.com/research/molclus.html> (accessed Mar-6, 2022).

**Figure S1.** Chiral HPLC analysis profiles of compound **1** at 240nm

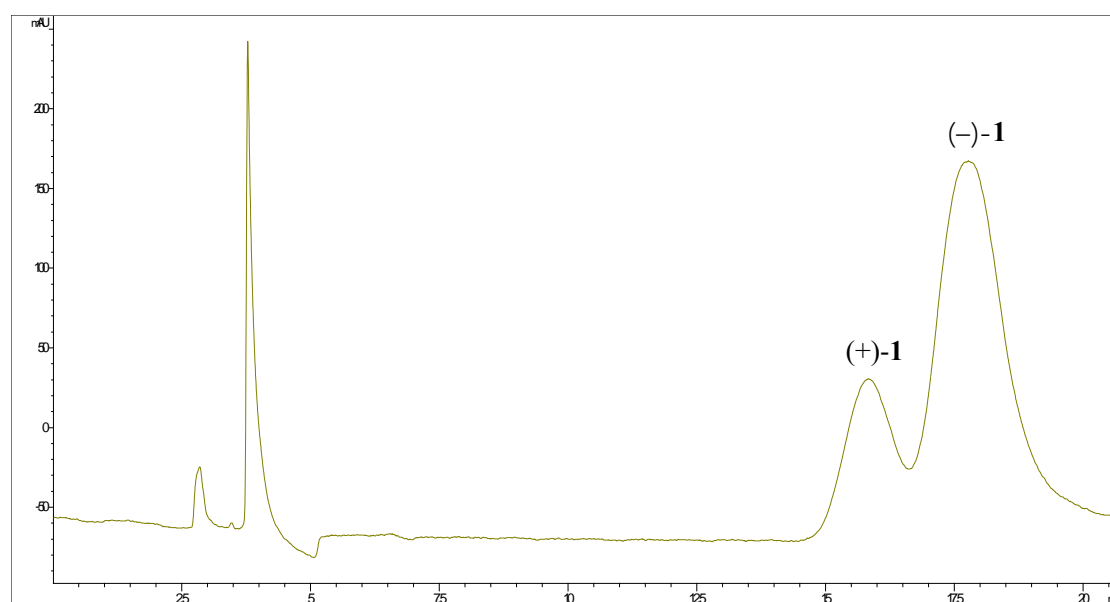

Note: PHENOMENEX chiral column eluted with *n*-hexane:isopropanol=81:19 containing 1% formic acid.

**Figure S2.** Chiral HPLC analysis profiles of compound **2** at 230nm

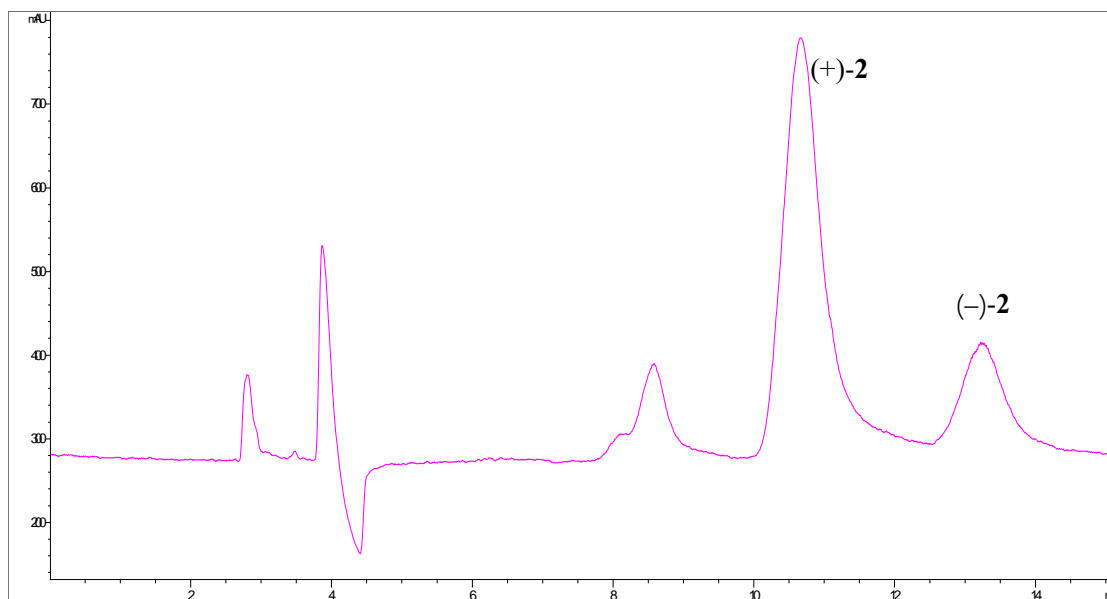

Note: PHENOMENEX chiral column eluted with *n*-hexane:isopropanol=85:15 containing 1% formic acid.

**Figure S3.** Chiral HPLC analysis profiles of compound **3** at 230nm

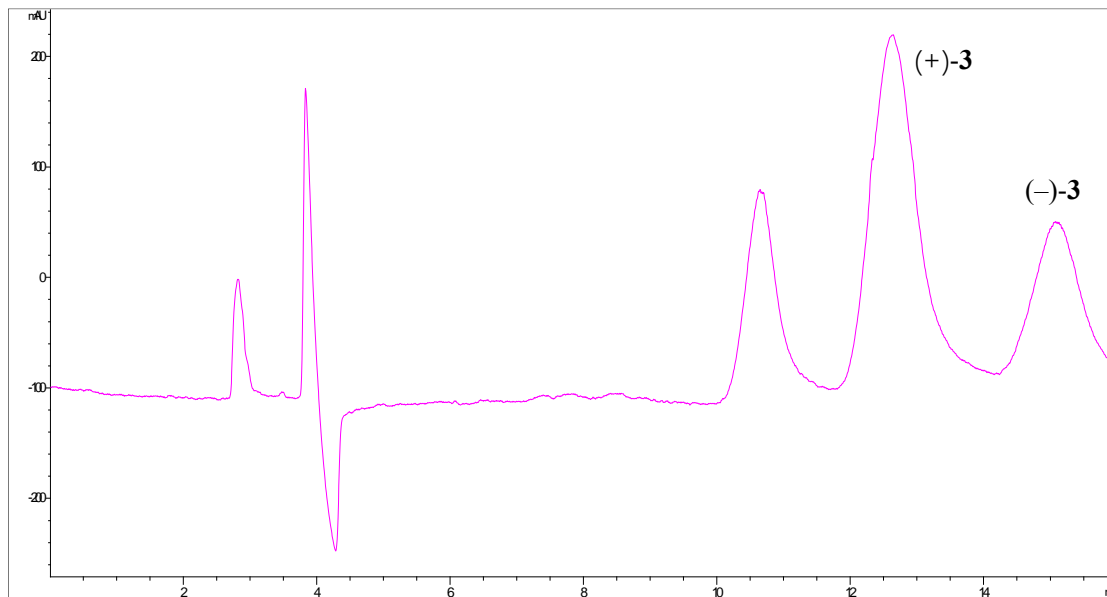

Note: PHENOMENEX chiral column eluted with *n*-hexane:isopropanol=85:15 containing 1% formic acid.

**Table S1.** Predicted 57 biosynthetic gene clusters using antiSMASH with a “loose” detection strictness setting

| Region    | Type                                                 | From    | To      | Most similar known cluster                                                  | Similarity |
|-----------|------------------------------------------------------|---------|---------|-----------------------------------------------------------------------------|------------|
| Region 1  | betalactone                                          | 178212  | 205992  | divergolide A/divergolide B/divergolide C/divergolide D                     | 6%         |
| Region 2  | saccharide                                           | 212614  | 233384  | murayaquinone                                                               | 10%        |
| Region 3  | fatty_acid                                           | 268209  | 290590  | metatricycloene                                                             | 6%         |
| Region 4  | Saccharide, butyrolactone, ectoine                   | 302298  | 364308  | showdomycin                                                                 | 52%        |
| Region 5  | saccharide                                           | 427230  | 448195  |                                                                             |            |
| Region 6  | NRPS                                                 | 723200  | 777692  | phosphonoglycans                                                            | 3%         |
| Region 7  | saccharide                                           | 829632  | 860069  | avilamycin A/avilamycin C                                                   | 5%         |
| Region 8  | saccharide                                           | 965020  | 986000  |                                                                             |            |
| Region 9  | RRE-containing, thiopeptide,LAP                      | 1005575 | 1040402 |                                                                             |            |
| Region 10 | NRPS-like                                            | 1277951 | 1321919 | bottromycin A2                                                              | 39%        |
| Region 11 | NI-siderophore                                       | 1390629 | 1420407 | desferrioxamin B                                                            | 100%       |
| Region 12 | fatty_acid                                           | 1471632 | 1496174 | undecylprodigiosin/metacycloprodigiosin                                     | 8%         |
| Region 13 | lanthipeptide-class-iii, lanthipeptide-class-ii      | 1506504 | 1538114 |                                                                             |            |
| Region 14 | saccharide                                           | 1683206 | 1722466 | phosphonoglycans                                                            | 10%        |
| Region 15 | saccharide                                           | 1775460 | 1799098 | desulfoclethramycin/clethramycin                                            | 4%         |
| Region 16 | fatty_acid                                           | 1870427 | 1891458 | tetrachlorizine                                                             | 9%         |
| Region 17 | saccharide                                           | 2091402 | 2121764 | acarviostatin I03/acarviostatin II03/acarviostatin III03/acarviostatin IV03 | 33%        |
| Region 18 | saccharide                                           | 2242247 | 2267229 |                                                                             |            |
| Region 19 | ectoine                                              | 2519550 | 2529948 | ectoine                                                                     | 100%       |
| Region 20 | terpene                                              | 2982568 | 3003662 | steffimycin D                                                               | 19%        |
| Region 21 | halogenated                                          | 3418102 | 3439622 | deoxyhangtaimycin                                                           | 5%         |
| Region 22 | T3PKS, fatty_acid                                    | 3549573 | 3601750 | undecylprodigiosin                                                          | 9%         |
| Region 23 | T3PKS, NRPS, saccharide                              | 3661610 | 3742004 | diisonitrile antibiotic SF2768                                              | 22%        |
| Region 24 | terpene                                              | 3807192 | 3828202 |                                                                             |            |
| Region 25 | NRP-metallophore, NRPS, melanin                      | 3865798 | 3924518 | coelichelin                                                                 | 81%        |
| Region 26 | NRP-metallophore, NRPS, transAT-PKS, T1PKS, PKS-like | 3939564 | 4055936 | griseobactin                                                                | 100%       |
| Region 27 | terpene                                              | 4071873 | 4094086 | geosmin                                                                     | 100%       |
| Region 28 | butyrolactone                                        | 4121314 | 4132183 | coelimycin P1                                                               | 16%        |
| Region 29 | arylpolyyene, NRPS-like                              | 4141349 | 4184539 | o-dialkylbenzene 1/o-dialkylbenzene 2                                       | 12%        |
| Region 30 | T1PKS, NRPS, RRE-containing,                         | 4197341 | 4250231 | lactazole                                                                   | 33%        |

|           |                                                 |         |         |                                                                                                               |      |
|-----------|-------------------------------------------------|---------|---------|---------------------------------------------------------------------------------------------------------------|------|
|           | thiopeptide,LAP                                 |         |         |                                                                                                               |      |
| Region 31 | terpene                                         | 4262735 | 4288320 | isorenieratene                                                                                                | 100% |
| Region 32 | NRPS, T3PKS                                     | 4397588 | 4514765 | alkylresorcinol                                                                                               | 100% |
| Region 33 | saccharide, melanin,RiPP-like, NRPS, fatty_acid | 4519368 | 4641892 | valinomycin/montanastatin                                                                                     | 91%  |
| Region 34 | NRPS                                            | 4697180 | 4764404 | crochelin A                                                                                                   | 16%  |
| Region 35 | RiPP-like, T1PKS, NRPS                          | 4807159 | 4859201 | 10-epi-HSAF/10-epi-3-deOH-HSAF/10-epi-maltophilin/10-epi-xanthobaccin C/10-epi-hydroxymaltophilin/10-epi-FI-2 | 100% |
| Region 36 | T1PKS                                           | 4896322 | 4995821 | bafilomycin B1                                                                                                | 100% |
| Region 37 | fatty_acid, thioamide-NRP                       | 4996595 | 5061348 | cadaside A/cadaside B                                                                                         | 19%  |
| Region 38 | terpene, saccharide                             | 5094369 | 5129744 | hopene                                                                                                        | 69%  |
| Region 39 | fatty_acid                                      | 5287226 | 5308185 |                                                                                                               |      |
| Region 40 | fatty_acid                                      | 5377036 | 5405230 | nonactin/monactin/dinactin/trinactin/tetranactin                                                              | 100% |
| Region 41 | NRPS, NRPS-like, fatty_acid                     | 5540515 | 5602480 | asukamycin                                                                                                    | 11%  |
| Region 42 | saccharide                                      | 5662307 | 5693400 | conglobatin                                                                                                   | 15%  |
| Region 43 | RiPP-like                                       | 5726575 | 5737981 |                                                                                                               |      |
| Region 44 | saccharide                                      | 5792203 | 5827170 | glycopeptidolipid                                                                                             | 5%   |
| Region 45 | NRPS, hydrogen-cyanide                          | 5839751 | 5887069 | leucomycin                                                                                                    | 11%  |
| Region 46 | T2PKS, saccharide                               | 5949123 | 6021614 | medermycin                                                                                                    | 75%  |
| Region 47 | NI-siderophore                                  | 6120370 | 6153156 | kinamycin                                                                                                     | 16%  |
| Region 48 | terpene, saccharide                             | 6536320 | 6571261 | stambomycin A/stambomycin B/stambomycin C/stambomycin D                                                       | 16%  |
| Region 49 | saccharide                                      | 6574163 | 6602087 | lavendiol                                                                                                     | 6%   |
| Region 50 | saccharide                                      | 6655576 | 6678253 |                                                                                                               |      |
| Region 51 | saccharide                                      | 6844119 | 6868608 |                                                                                                               |      |
| Region 52 | lanthipeptide-class-iii                         | 6896866 | 6919592 | AmfS                                                                                                          | 100% |
| Region 53 | saccharide                                      | 7087152 | 7115500 | notonesomycin A                                                                                               | 6%   |
| Region 54 | halogenated                                     | 7526955 | 7548238 | colibrimycin                                                                                                  | 17%  |
| Region 55 | lanthipeptide-class-i                           | 7674268 | 7699536 |                                                                                                               |      |
| Region 56 | lassopeptide                                    | 7830235 | 7852977 | keywimysin                                                                                                    | 100% |
| Region 57 | T2PKS, halogenated                              | 7893896 | 7966387 | maduralactomycin A/maduralactomycin B/actinospirol A/actinospirol B                                           | 63%  |

**Table S2.** Predicted function of the open reading frames

| Protein | Amino acids | Putative function                       | Nearest homologue (enzyme, origin)                                              | Identity /similarity [%] | Accession number |
|---------|-------------|-----------------------------------------|---------------------------------------------------------------------------------|--------------------------|------------------|
| ORF7    | 179         | <i>O</i> -acetyl-ADP-ribose deacetylase | <i>O</i> -acetyl-ADP-ribose deacetylase<br>[ <i>Streptomyces</i> sp. DvalAA-19] | 99%/100%                 | WP_093752860.1   |

|      |     |                                     |                                                                        |          |                 |
|------|-----|-------------------------------------|------------------------------------------------------------------------|----------|-----------------|
| ORF6 | 483 | threonine/serine exporter           | threonine/serine exporter family protein [Streptomyces sp. CAI-24]     | 98%/98 % | WP_3092 36270.1 |
| ORF5 | 472 | NAD(P)/FAD-dependent oxidoreductase | NAD(P)/FAD-dependent oxidoreductase [Streptomyces sp. YIM 132580]      | 96%/97 % | WP_2024 18510.1 |
| ORF4 | 282 | inositol monophosphatase            | inositol monophosphatase family protein [Streptomyces sp. S8]          | 97%/97 % | WP_0849 91105.1 |
| ORF3 | 207 | transcriptional regulator           | response regulator transcription factor [Streptomyces sp. B27]         | 99%/99 % | WP_1274 65383.1 |
| ORF2 | 292 | enoyl-CoA hydratase                 | enoyl-CoA hydratase/isomerase family protein [Streptomyces sp. CFMR 7] | 96%/96 % | WP_0535 58551.1 |
| ORF1 | 319 | ABC transporter ATP-binding protein | ABC transporter ATP-binding protein [Streptomyces sp. CS090A]          | 92%/96 % | WP_1099 80241.1 |
| HmnA | 269 | ABC transporter permease subunit    | ABC transporter permease subunit [Streptomyces sp. ZL-24]              | 99%/99 % | WP_1034 19230.1 |
| HmnB | 431 | beta-ketoacyl synthase              | beta-ketoacyl synthase [Streptomyces sp. S8]                           | 96%/97 % | ARI5631 7.1     |
| HmnC | 582 | CoA-transferase                     | CoA-transferase [Streptomyces sp. CAI-24]                              | 99%/99 % | WP_175 451846.1 |
| HmnD | 349 | ketoacyl-ACP synthase III           | ketoacyl-ACP synthase III [Streptomyces sp. SID8374]                   | 97%/98 % | WP_1612 81099.1 |
| HmnE | 323 | ketoacyl-ACP synthase III           | ketoacyl-ACP synthase III [Streptomyces sp. S6]                        | 98%/99 % | QCW799 81.1     |
| HmnF | 305 | 3-ketoacyl-ACP reductase            | 3-ketoacyl-ACP reductase [Streptomyces griseus subsp. griseus]         | 88%/91 % | TVP3409 3.1     |
| HmnG | 275 | short-chain dehydrogenase           | short-chain dehydrogenase [Streptomyces griseus subsp. griseus]        | 97%/98 % | TVP3409 2.1     |
| HmnH | 453 | beta-ketoacyl synthase              | NonK [Streptomyces griseus subsp. griseus]                             | 94%/96 % | AAD374 50.1     |
| HmnI | 427 | beta-ketoacyl synthase              | 3-oxoacyl-ACP synthase [Streptomyces griseus subsp. griseus]           | 91%/95 % | TVP3409 0.1     |
| HmnJ | 523 | SDR family oxidoreductase           | putative ketoacyl reductase [Streptomyces griseus subsp. griseus]      | 83%/86 % | AAD374 52.1     |
| HmnK | 272 | SDR family oxidoreductase           | acetoacetyl-CoA reductase [Streptomyces griseus subsp. griseus]        | 87%/91 % | TVP340 88.1     |
| HmnL | 567 | CocE/NonD family hydrolase          | X-Pro dipeptidyl-peptidase [Streptomyces griseus subsp. griseus]       | 87%/91 % | TVP3408 7.1     |
| HmnM | 562 | ATP-dependent acyl-CoA ligase       | ATP-dependent acyl-CoA ligase [Streptomyces sp. CFMR 7]                | 99%/99 % | WP_0535 58561.1 |
| HmnN | 301 | enoyl-CoA hydratase                 | NonS, nonactate synthase [Streptomyces griseus subsp. griseus]         | 90%/92 % | AAC261 35.1"    |
| HmnO | 292 | alpha/beta hydrolase                | tetranactin resistance protein [Streptomyces griseus subsp. griseus]   | 88%/92 % | AAD374 54.1     |

|      |     |                                       |                                                             |          |             |
|------|-----|---------------------------------------|-------------------------------------------------------------|----------|-------------|
| HmnP | 187 | ArsR family transcriptional regulator | ArsR family transcriptional regulator [Streptomyces sp. S6] | 98%/97 % | QCW799 77.1 |
|------|-----|---------------------------------------|-------------------------------------------------------------|----------|-------------|

**Figure S4.** Integrated cluster-node diagram of Molecular Networking

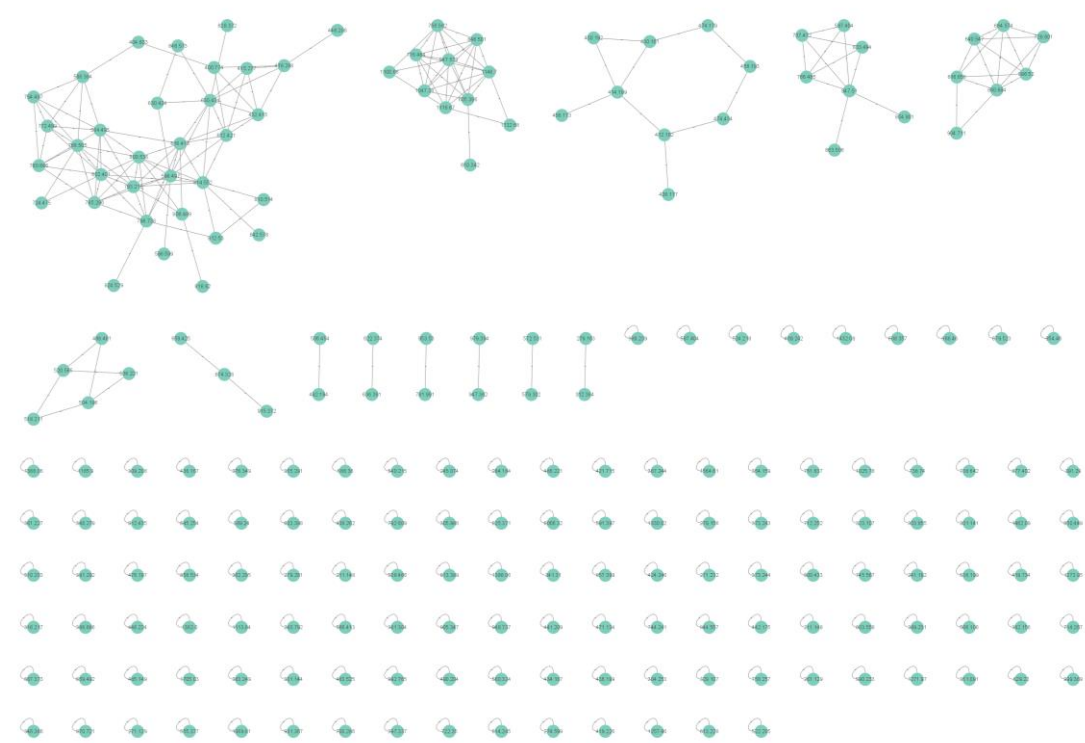

Note: The numbers on nodes represent parent ions.

**Table S3.** The chemical structures being annotated by GNPS

| Parent ion | Compound name                   | Compound structure |
|------------|---------------------------------|--------------------|
| 785.286    | Compound NP-002862 <sup>a</sup> |                    |
| 768.505    | Monactin                        |                    |
| 432.415    | Compound NP-002857 <sup>a</sup> |                    |
| 418.288    | Bonactin                        |                    |

|         |                                 |                                                                                   |
|---------|---------------------------------|-----------------------------------------------------------------------------------|
| 404.833 | Compound NP-003108 <sup>a</sup> | 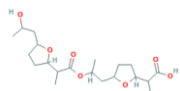 |
| 400.774 | Bonactin                        |  |

<sup>a</sup> PubChem name

**Figure S5.** LC-MS/MS profiles at 37.8 min, 39.4 min, and 42.2 min

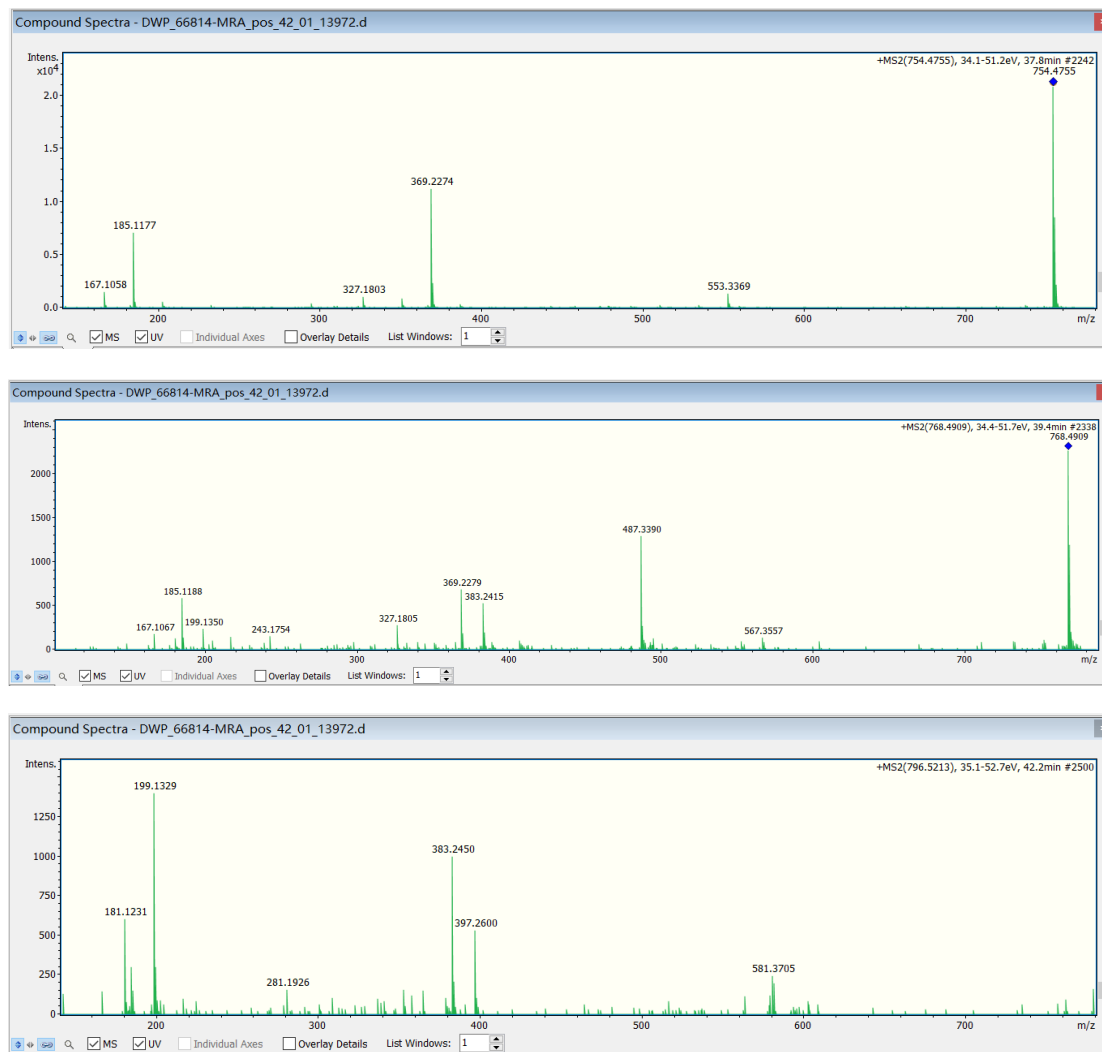

**Table S4.** The three compounds being confirmed by LC-MS/MS

| Number | Compounds | Adduct                              | Molecular formula                                | Measure <i>m/z</i> | Calculated <i>m/z</i> | <i>t<sub>R</sub></i> (min) |
|--------|-----------|-------------------------------------|--------------------------------------------------|--------------------|-----------------------|----------------------------|
| 1      | nonactin  | [M + NH <sub>4</sub> ] <sup>+</sup> | C <sub>40</sub> H <sub>68</sub> NO <sub>12</sub> | 754.4755           | 754.4736              | 37.8                       |

|   |          |                |                       |          |          |      |
|---|----------|----------------|-----------------------|----------|----------|------|
| 2 | monactin | $[M + NH_4]^+$ | $C_{41}H_{70}NO_{12}$ | 768.4909 | 768.4893 | 39.4 |
| 3 | trinatin | $[M + NH_4]^+$ | $C_{43}H_{74}NO_{12}$ | 796.5213 | 796.5206 | 42.2 |

**Figure S6.** The MS/MS cleavage fragments from nonactin

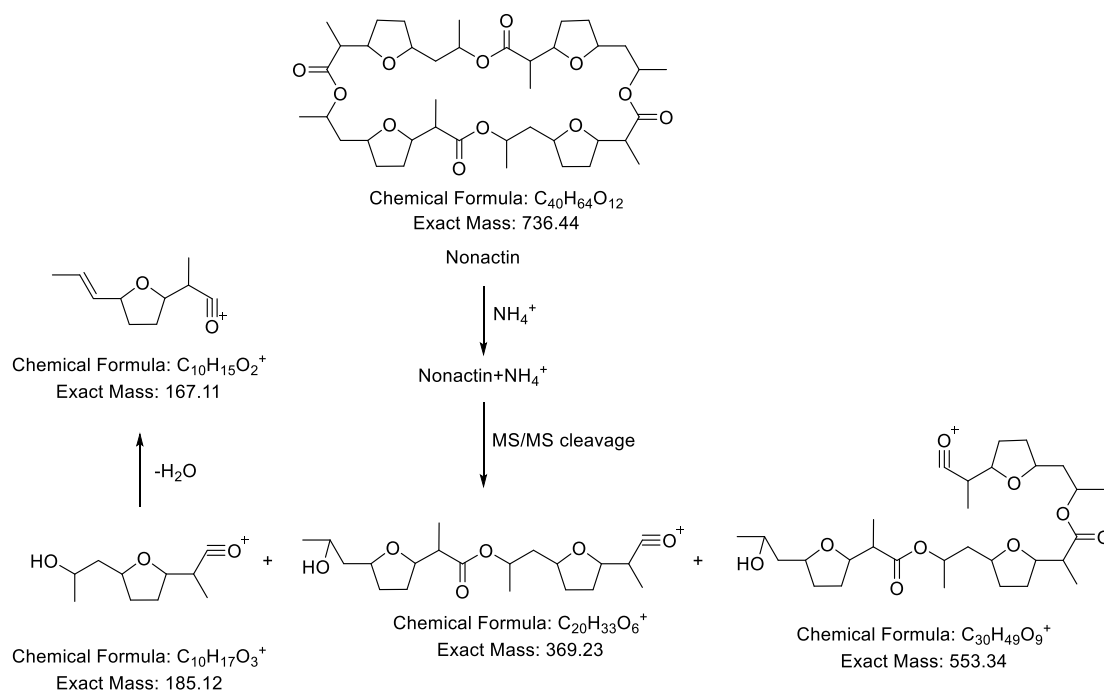

**Figure S7.** HRESIMS spectrum of compound **1**

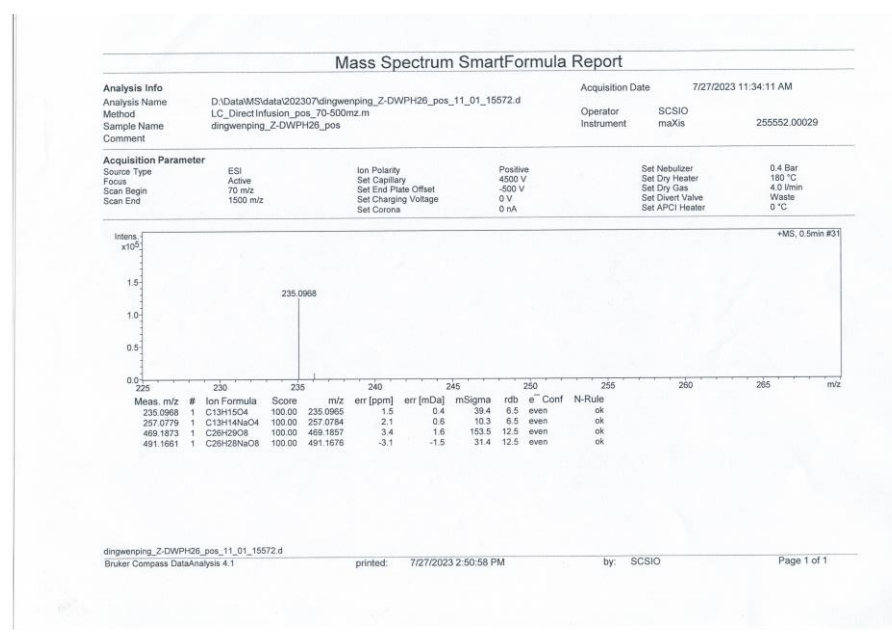

**Figure S8.**  $^1\text{H}$  NMR spectrum ( $\text{CD}_3\text{OD}$ , 700 MHz) of compound **1**

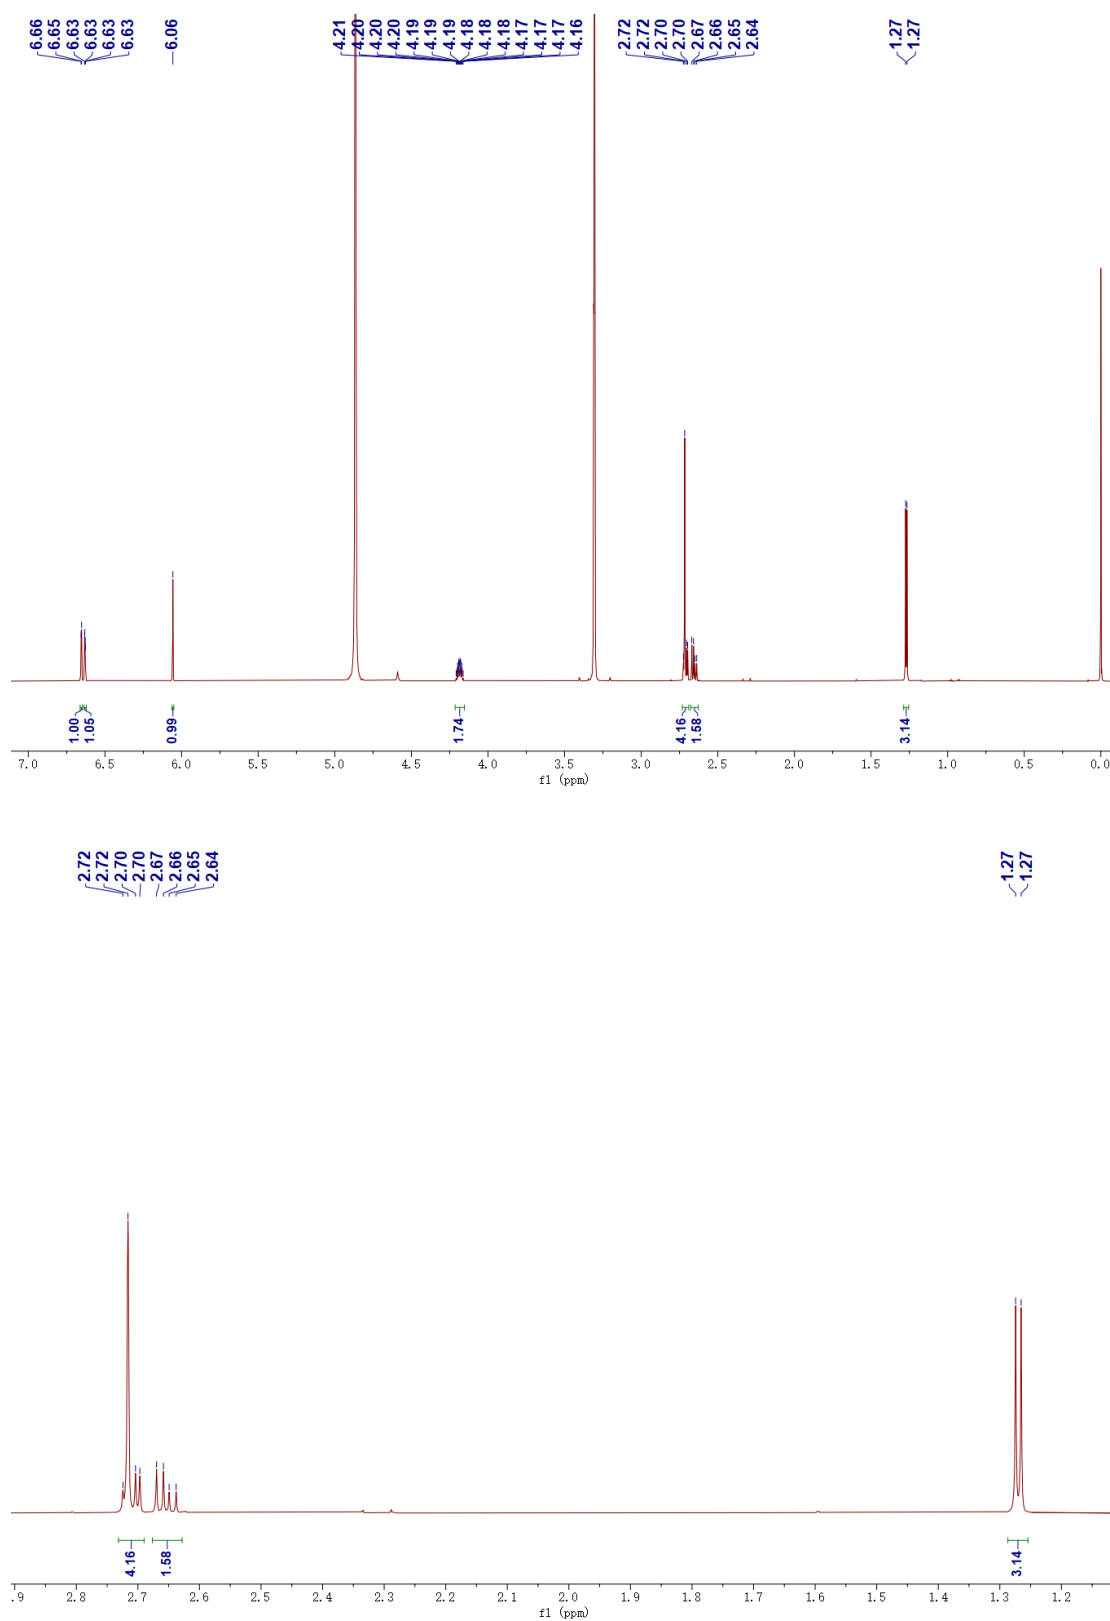

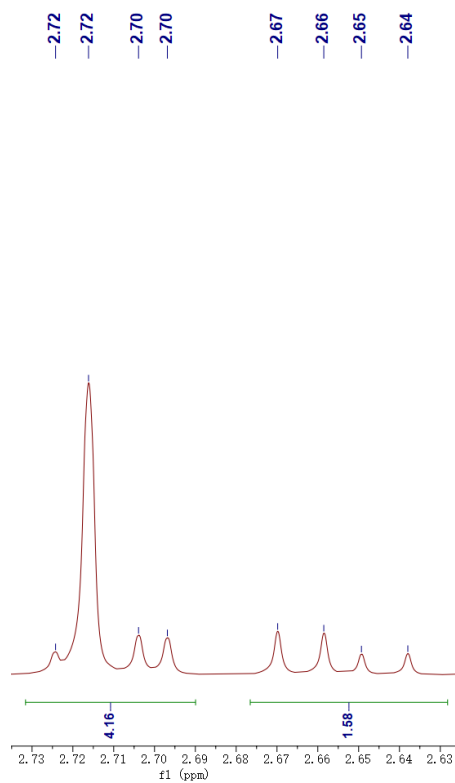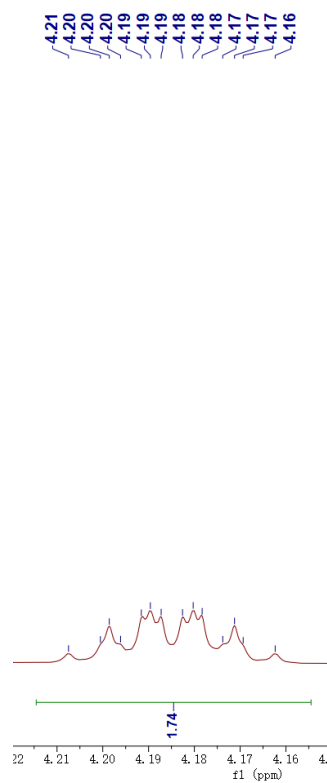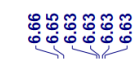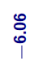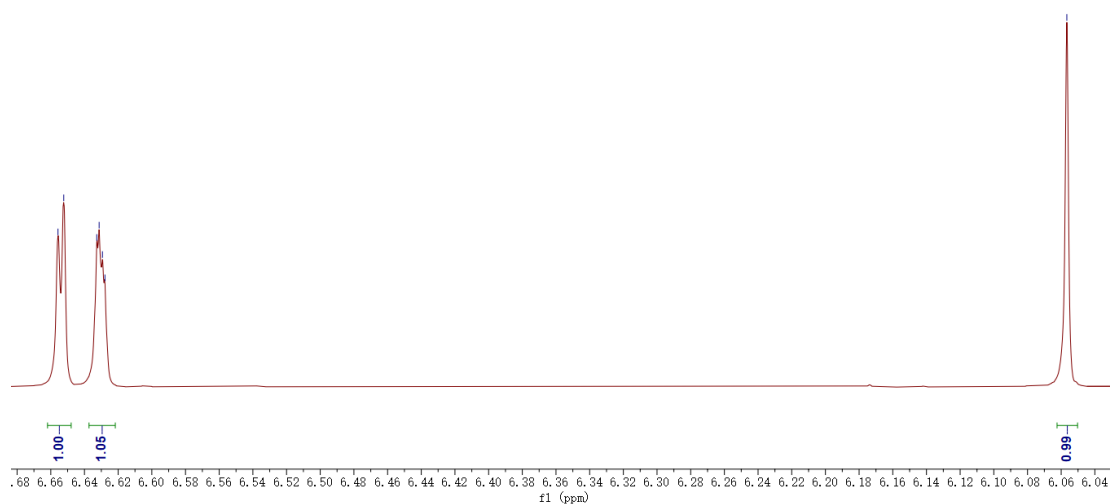

**Figure S9.**  $^{13}\text{C}$  NMR and DEPT spectra ( $\text{CD}_3\text{OD}$ , 176 MHz) of compound **1**

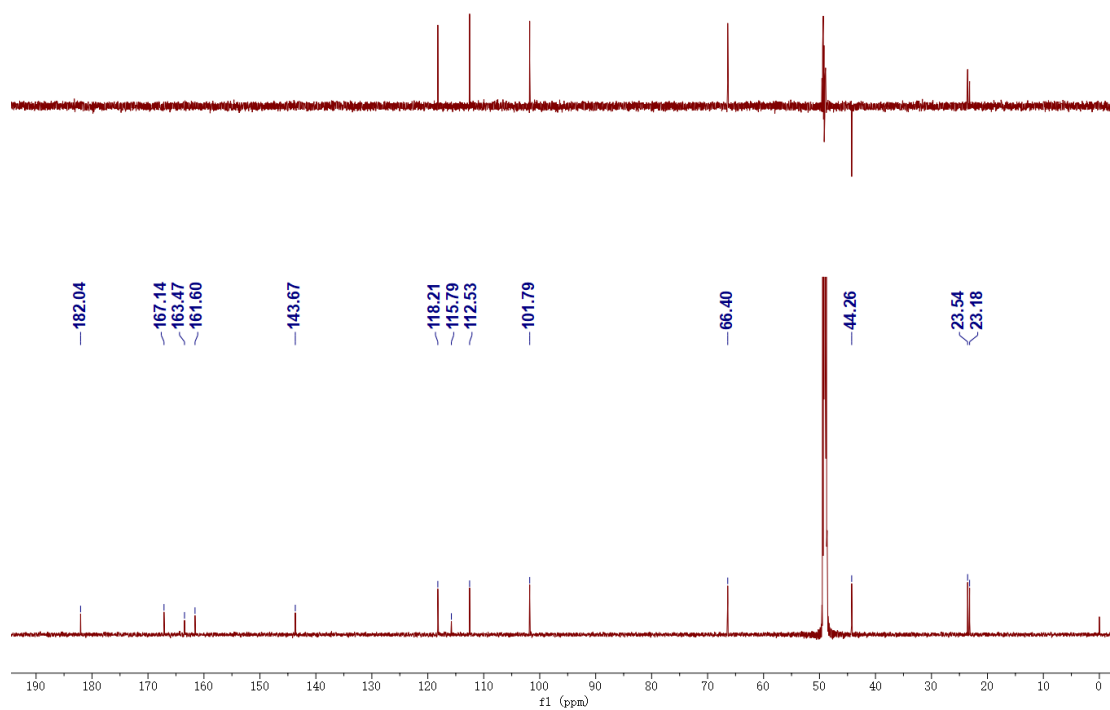

**Figure S10.** HSQC spectrum of compound **1**

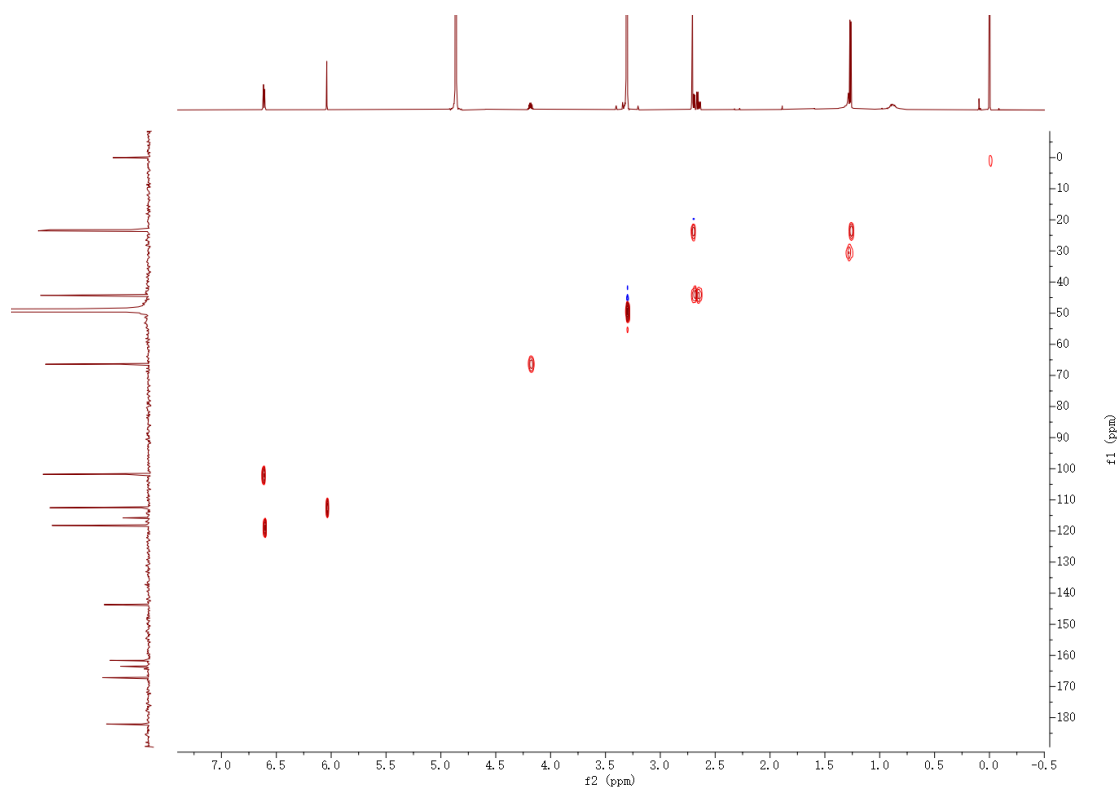

**Figure S11.** HMBC spectrum of compound **1**

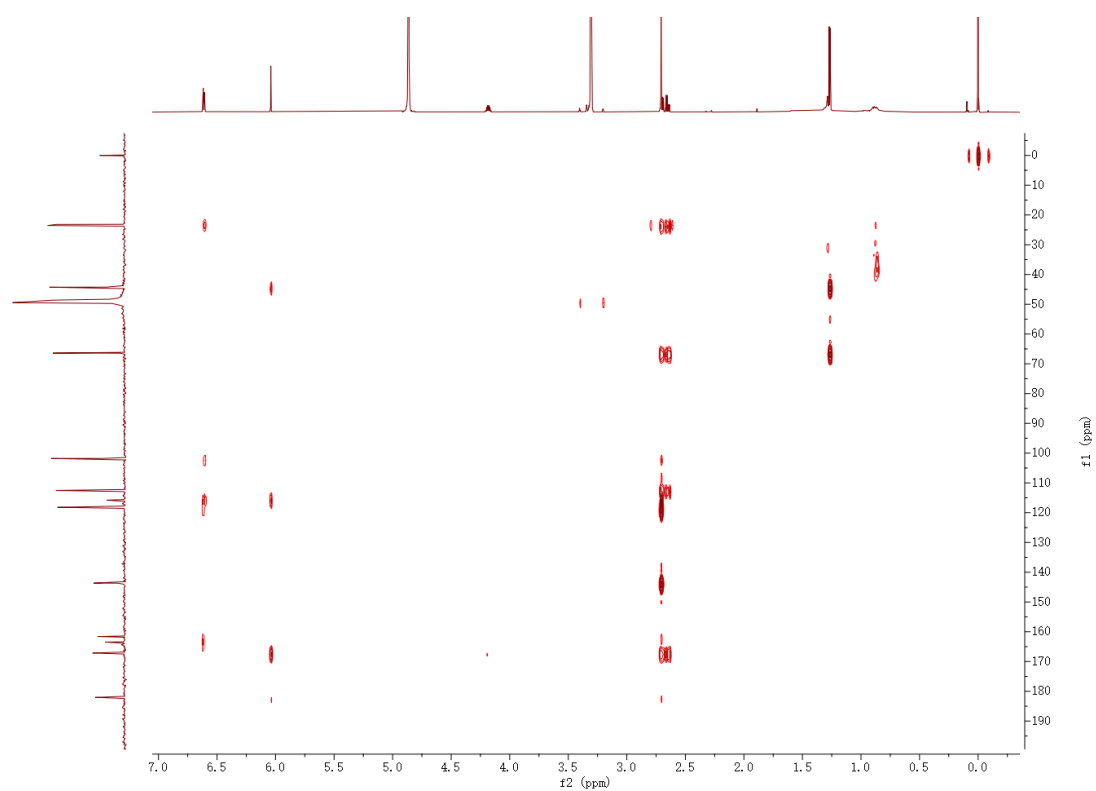

**Figure S12.**  $^1\text{H}$ – $^1\text{H}$  COSY spectrum of compound **1**

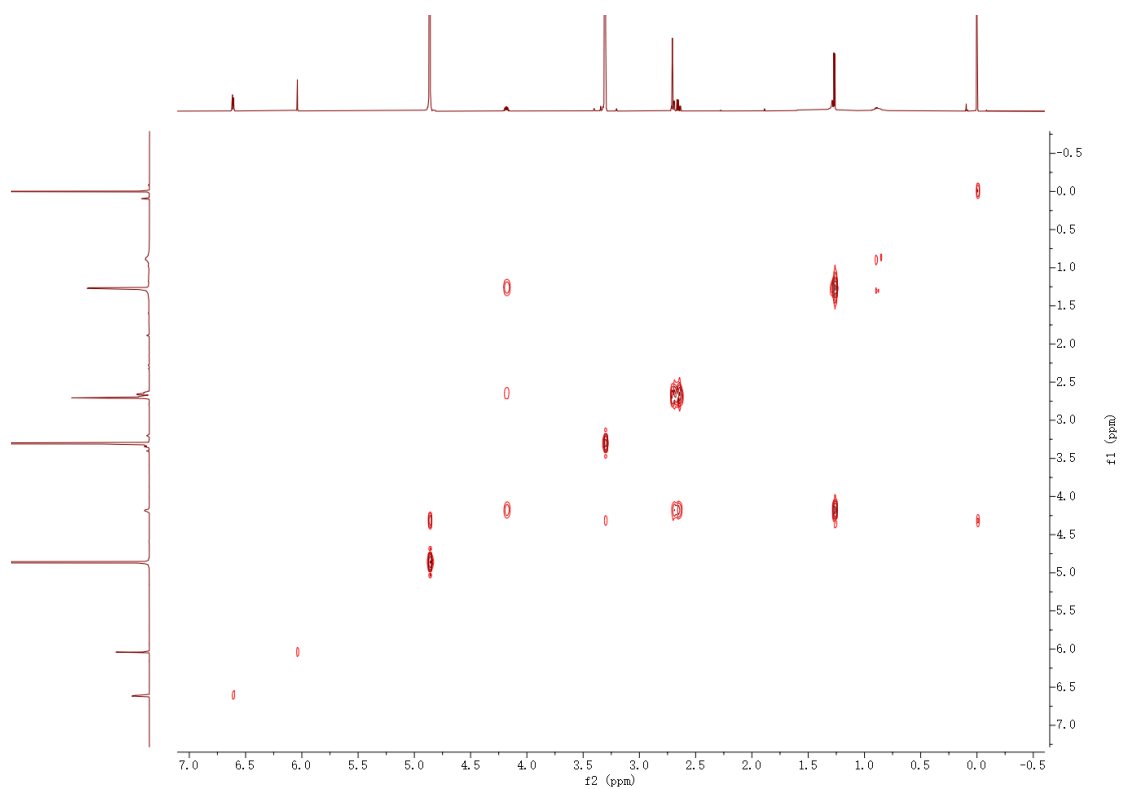

**Figure S13.** UV spectrum of compound **1**

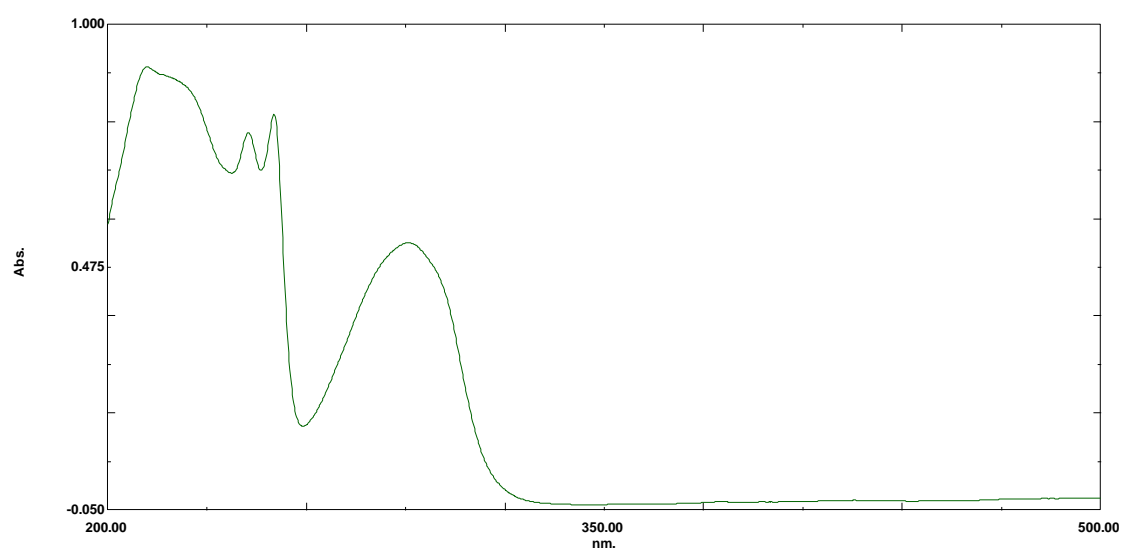

| No. | wavelength (nm) | Abs   |
|-----|-----------------|-------|
| 1   | 290.80          | 0.528 |
| 2   | 250.20          | 0.807 |
| 3   | 242.60          | 0.766 |
| 4   | 211.80          | 0.909 |

**Figure S14.** IR spectrum of compound **1**

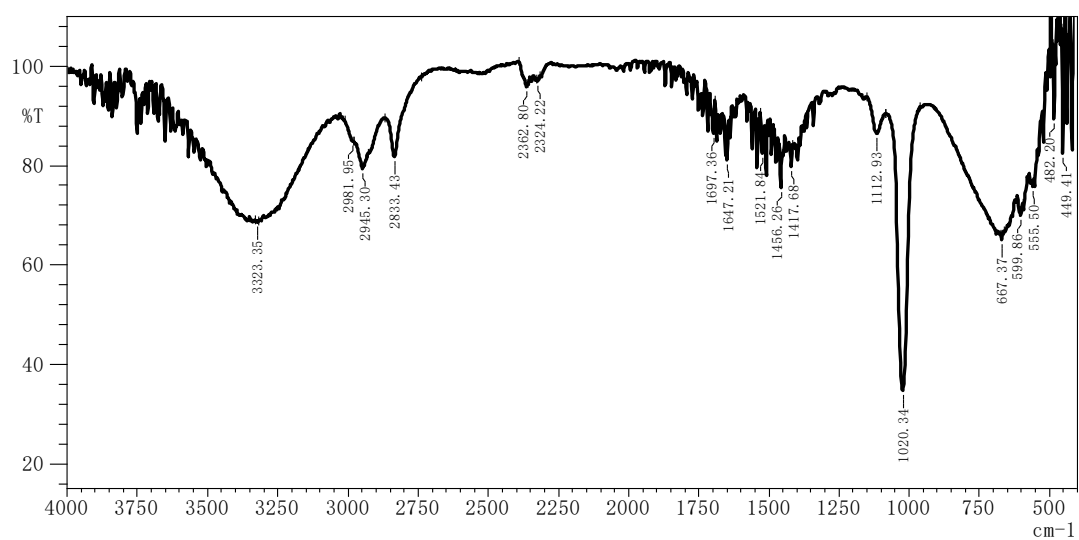

**Figure S15.** CD spectrum of compound **1a**

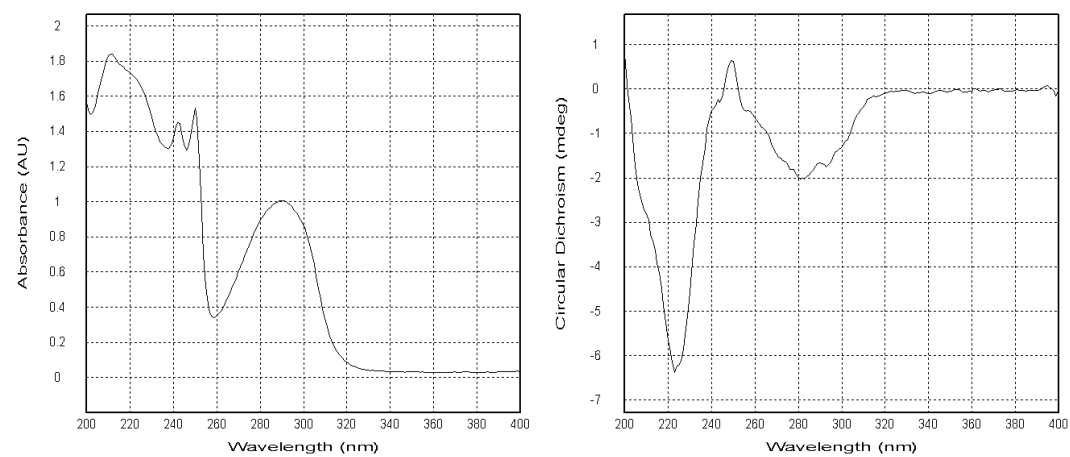

**Figure S16.** CD spectrum of compound **1b**

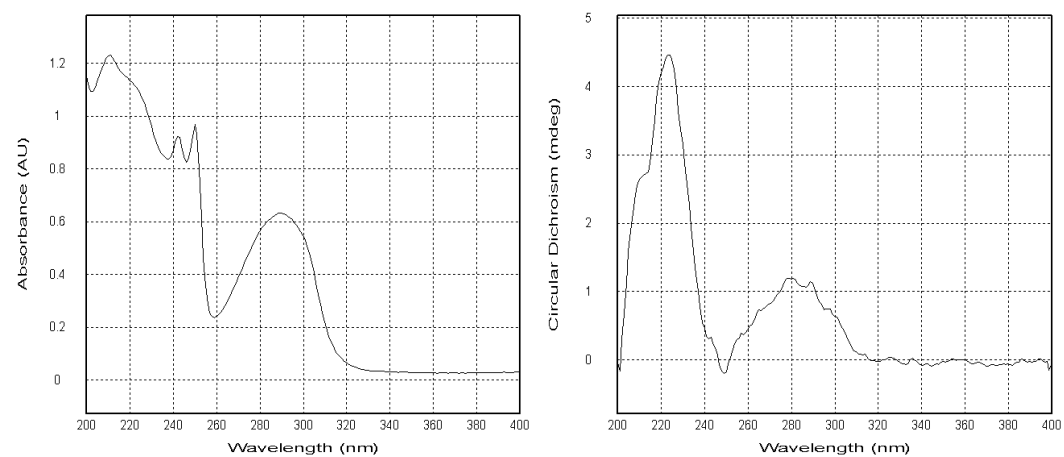

**Figure S17.** HRESIMS spectrum of compound **2**

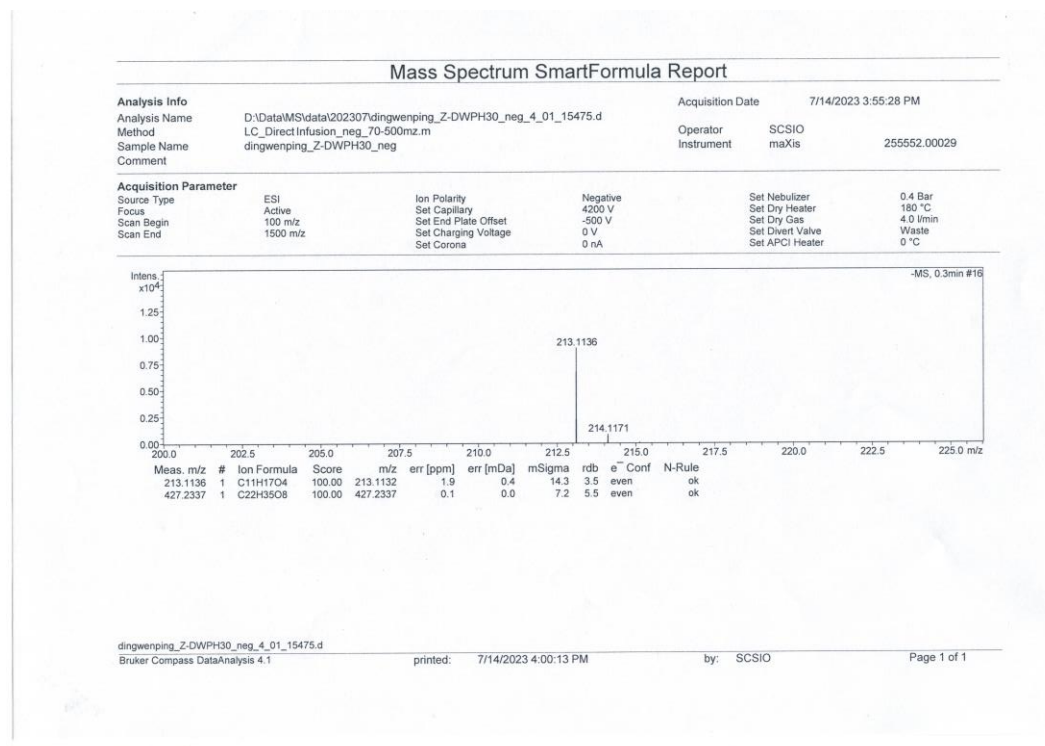

**Figure S18.**  $^1\text{H}$  NMR spectrum ( $\text{CD}_3\text{OD}$ , 700 MHz) of compound **2**

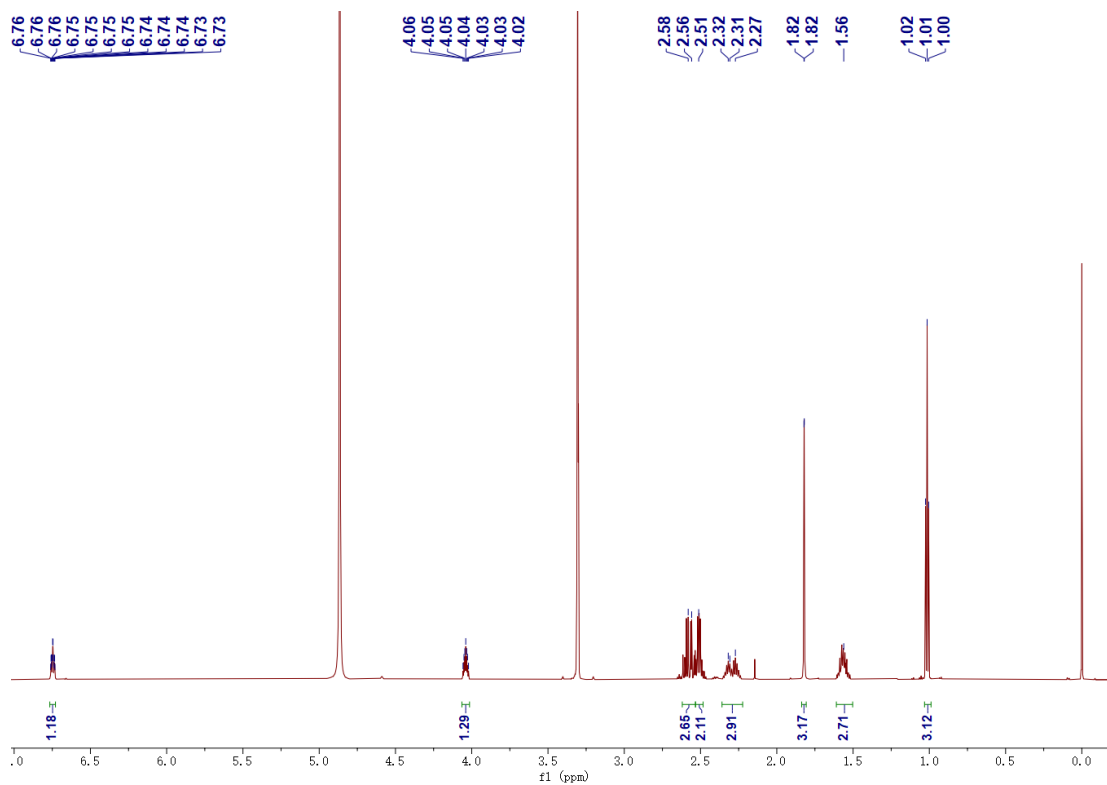

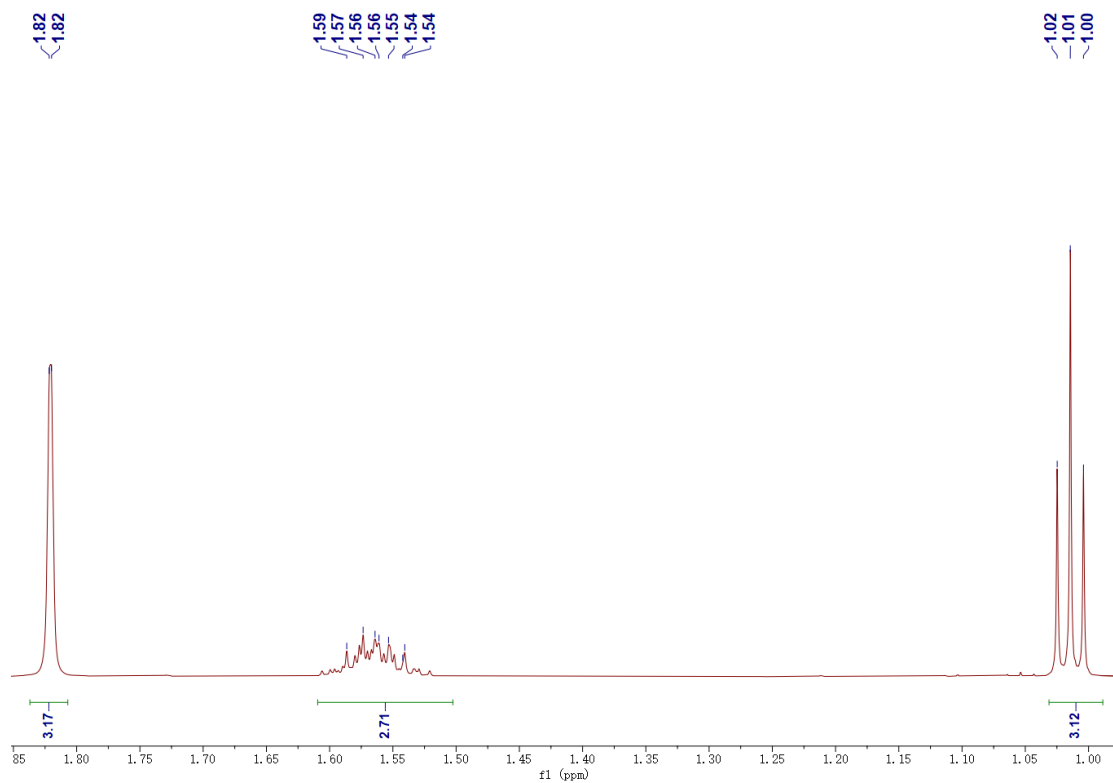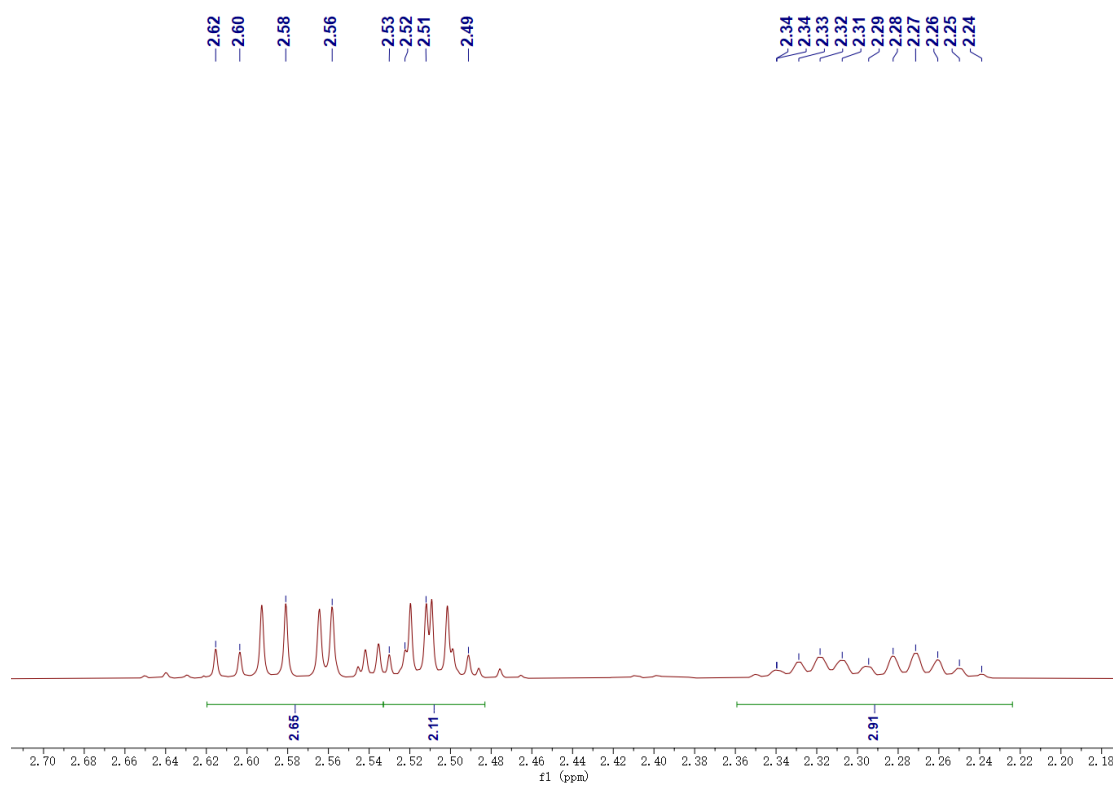

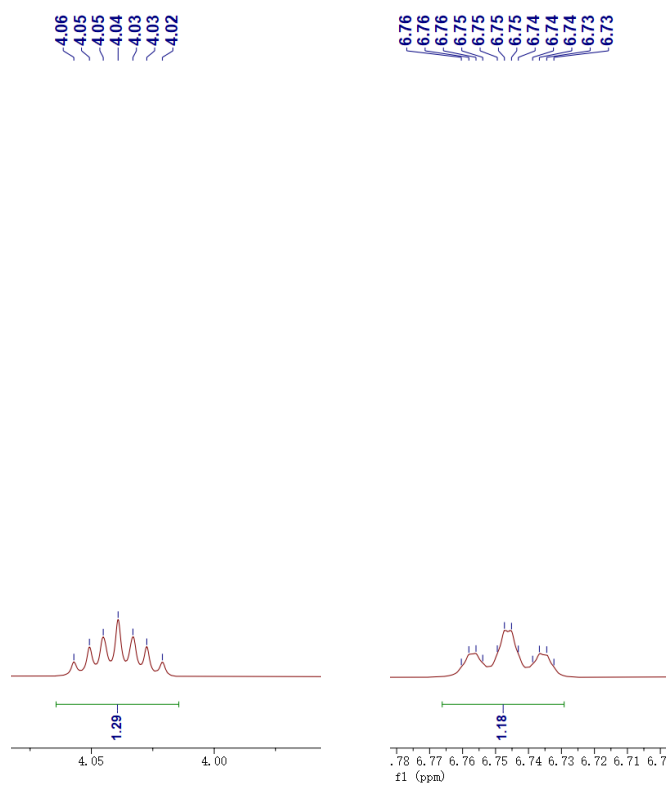

**Figure S19.**  $^{13}\text{C}$  NMR and DEPT spectra ( $\text{CD}_3\text{OD}$ , 176 MHz) of compound **2**

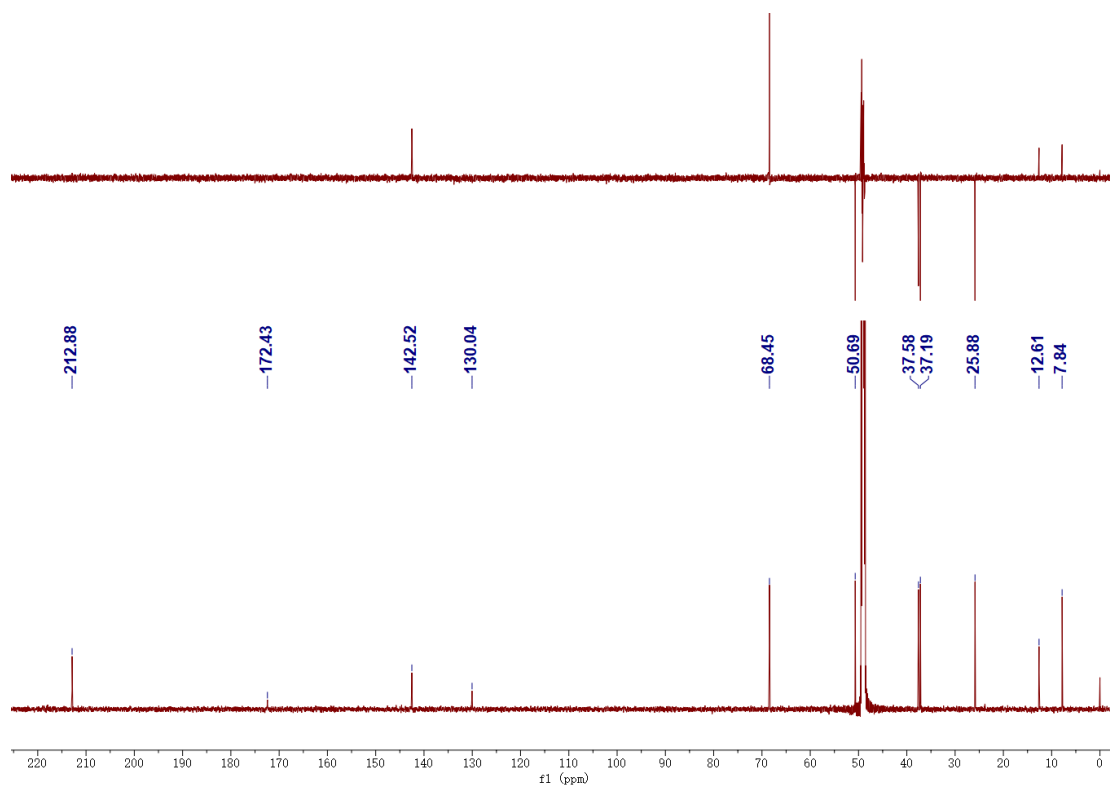

**Figure S20.** HSQC spectrum of compound **2**

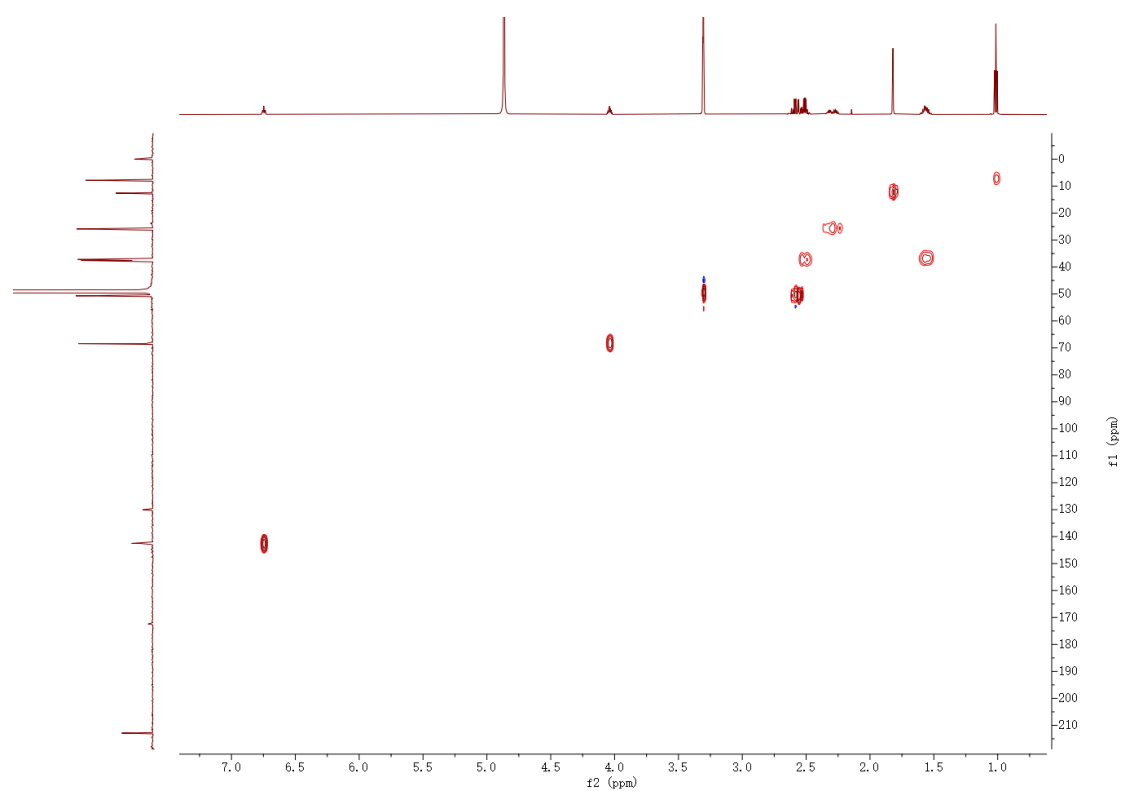

**Figure S21.** HMBC spectrum of compound **2**

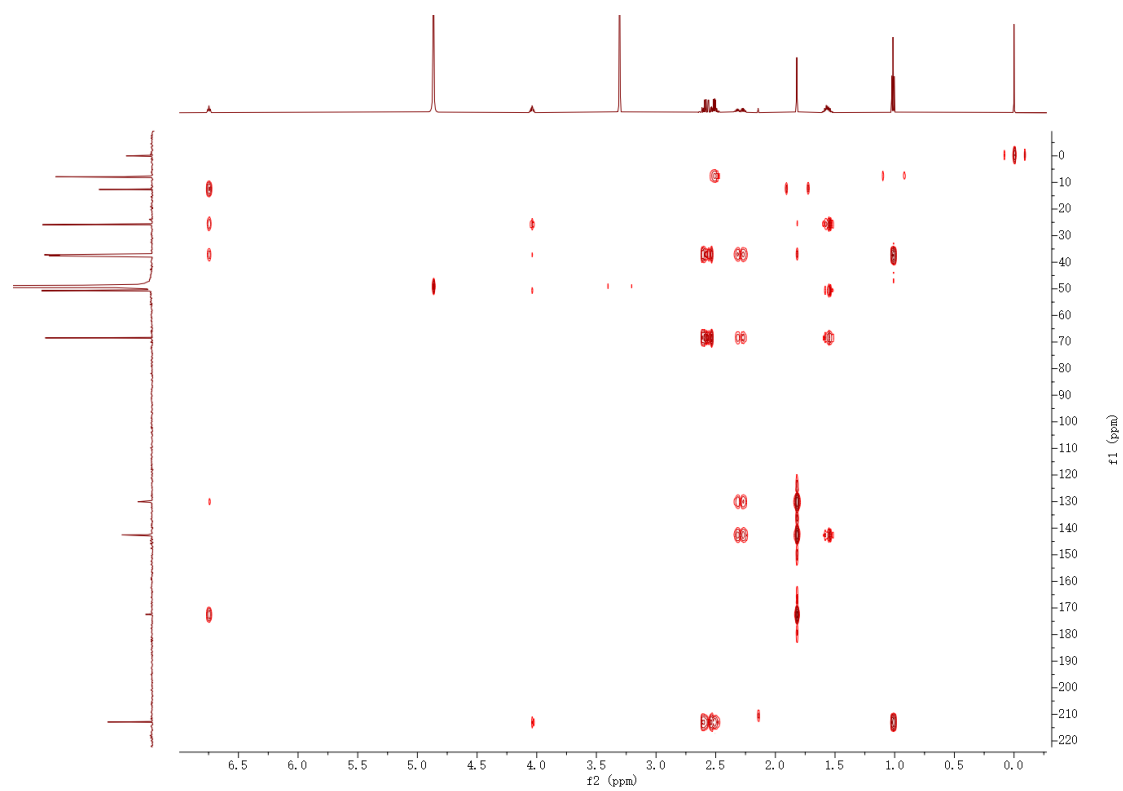

**Figure S22.**  $^1\text{H}$ - $^1\text{H}$  COSY spectrum of compound **2**

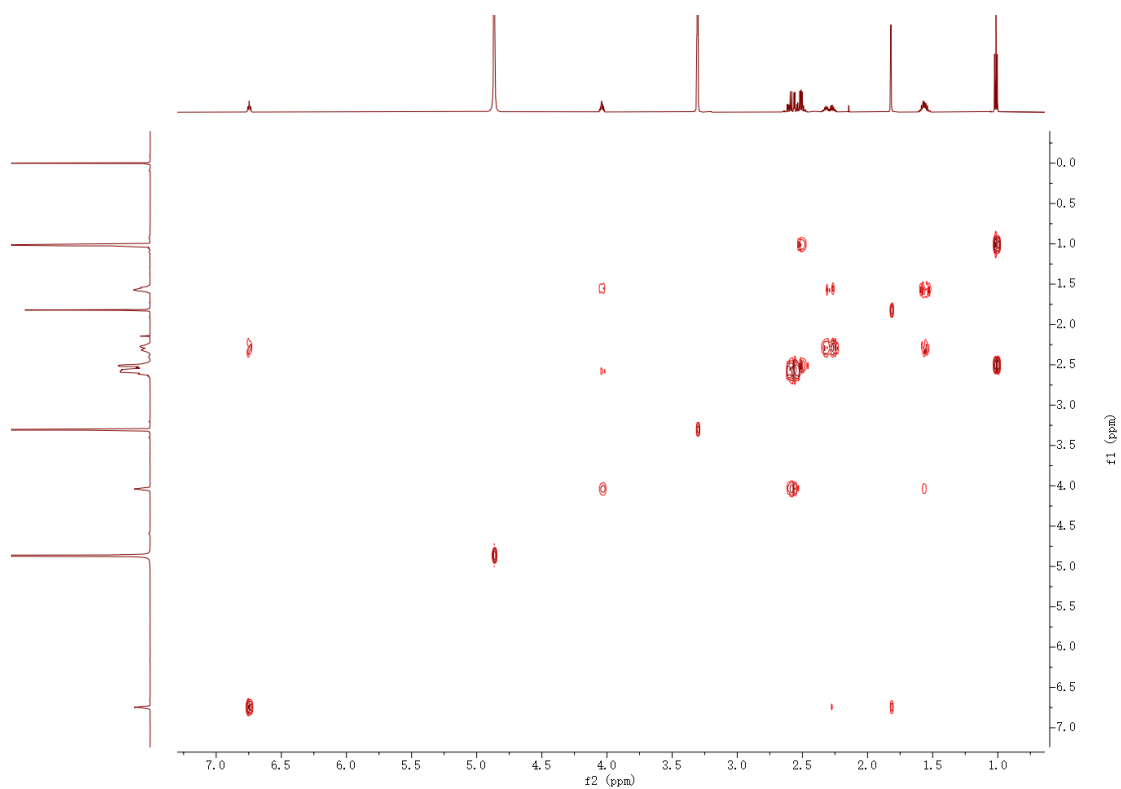

**Figure S23.** NOESY spectrum of compound **2**

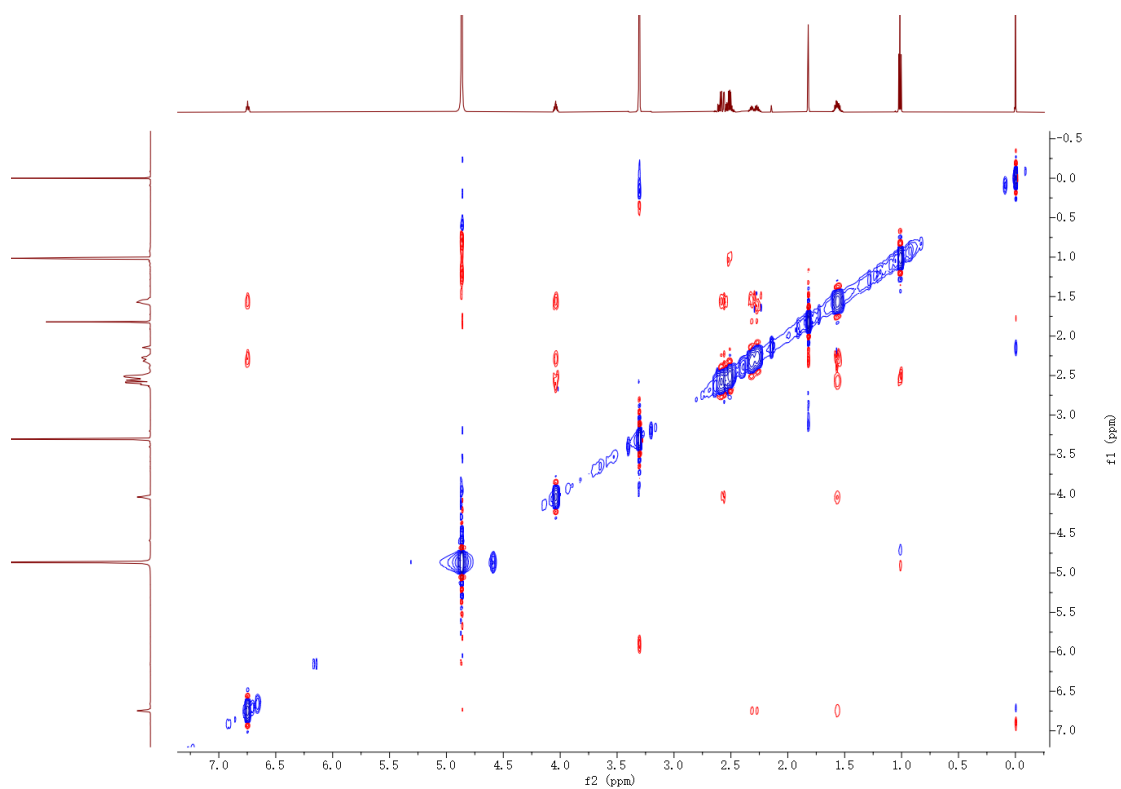

**Figure S24.** UV spectrum of compound **2**

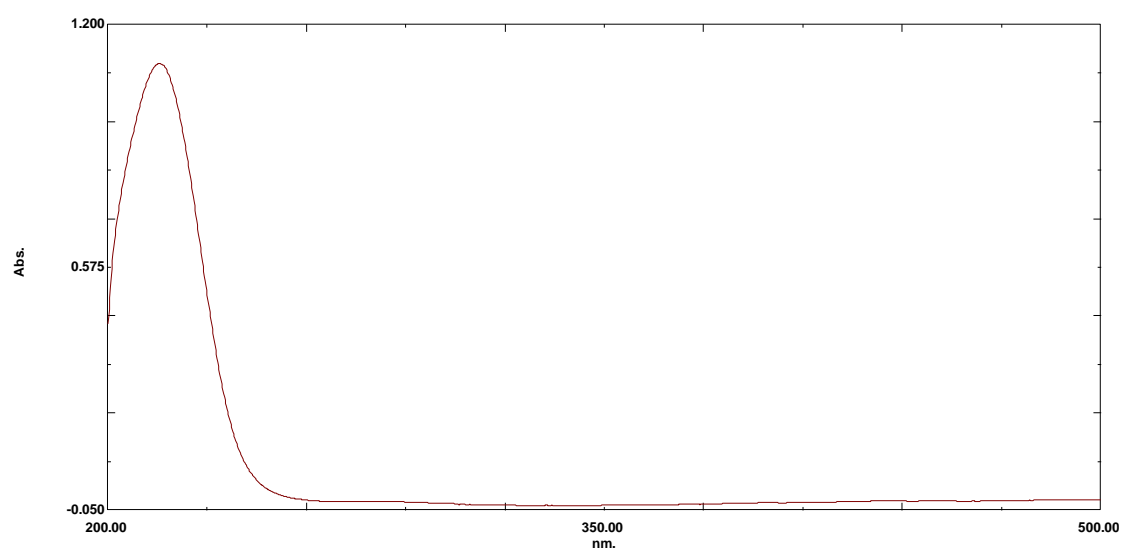

| No. | wavelength (nm) | Abs   |
|-----|-----------------|-------|
| 1   | 215.40          | 1.099 |

**Figure S25.** IR spectrum of compound **2**

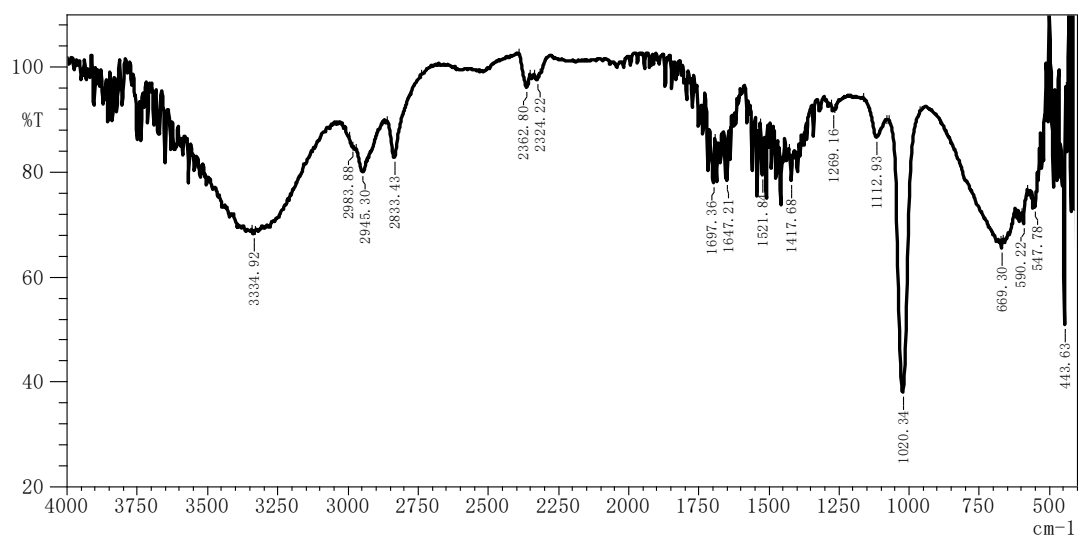

Figure S26. CD spectrum of compound 2a

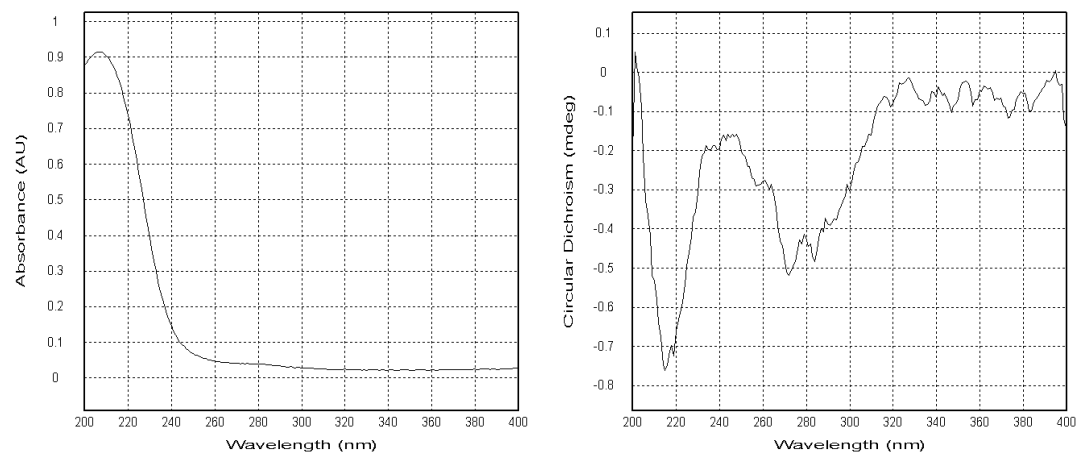

Figure S27. HRESIMS spectrum of compound 3

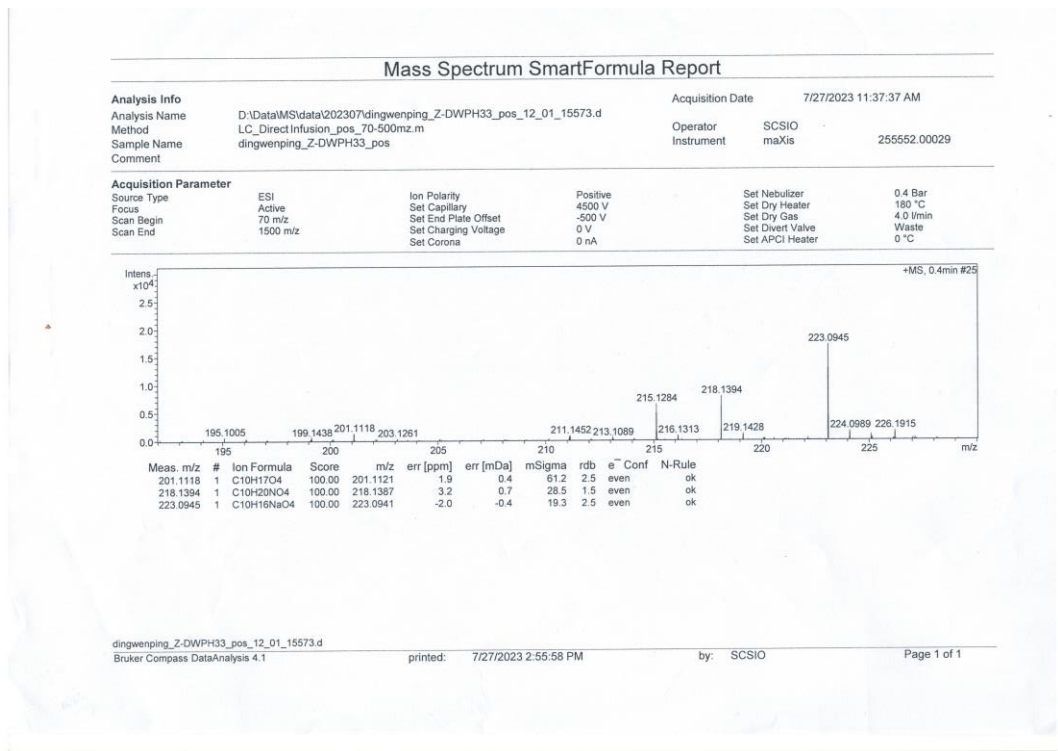

**Figure S28.**  $^1\text{H}$  NMR spectrum ( $\text{CD}_3\text{OD}$ , 700 MHz) of compound **3**

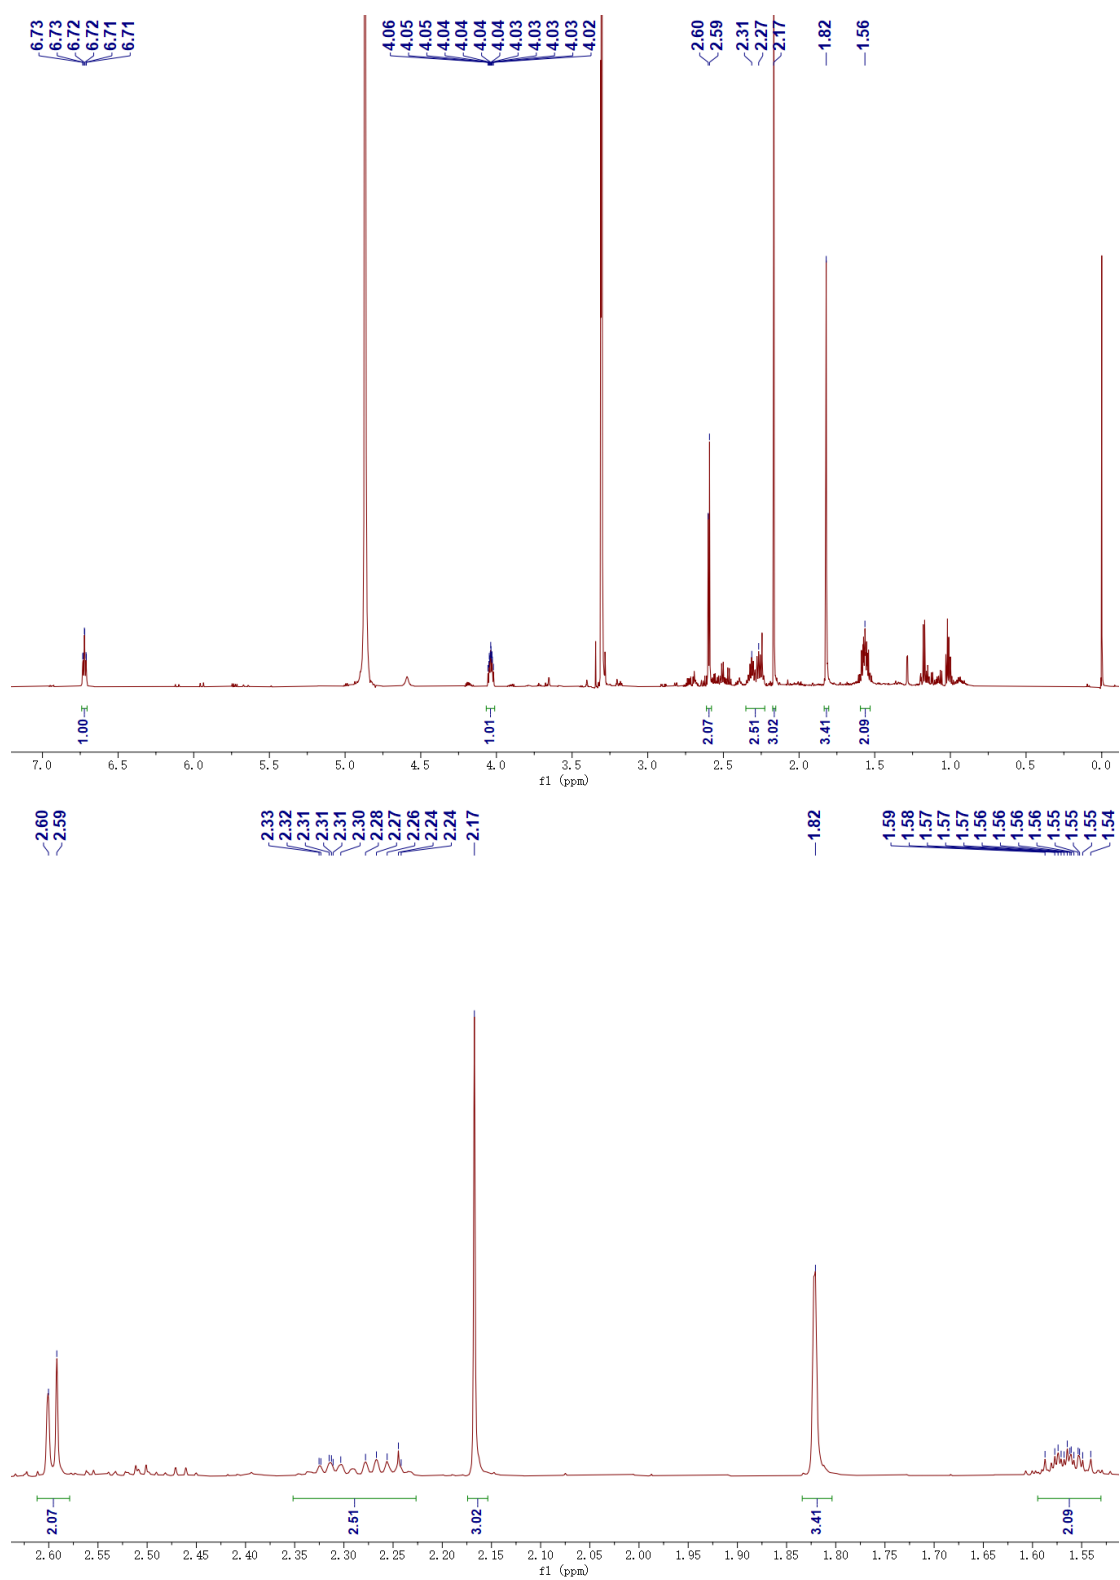

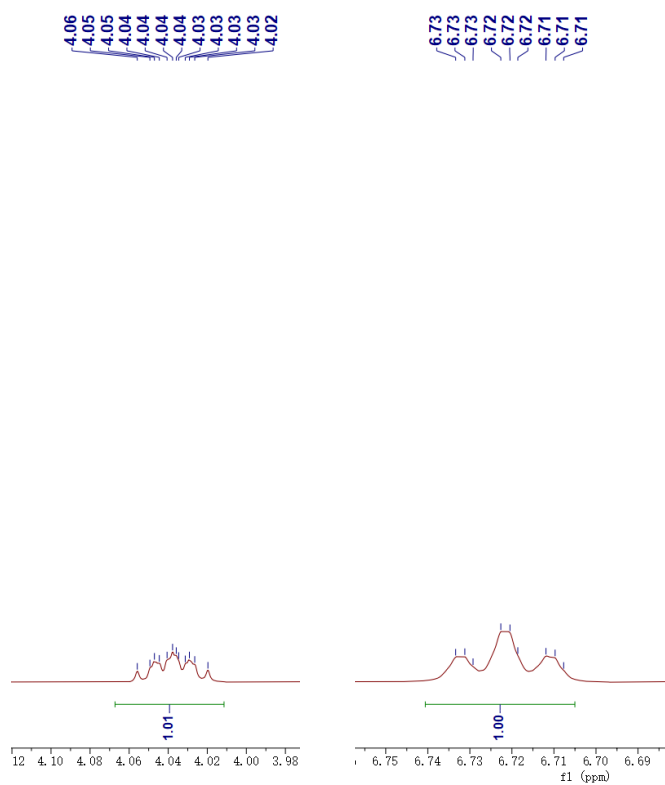

**Figure S29.**  $^{13}\text{C}$  NMR and DEPT spectra ( $\text{CD}_3\text{OD}$ , 176 MHz) of compound **3**

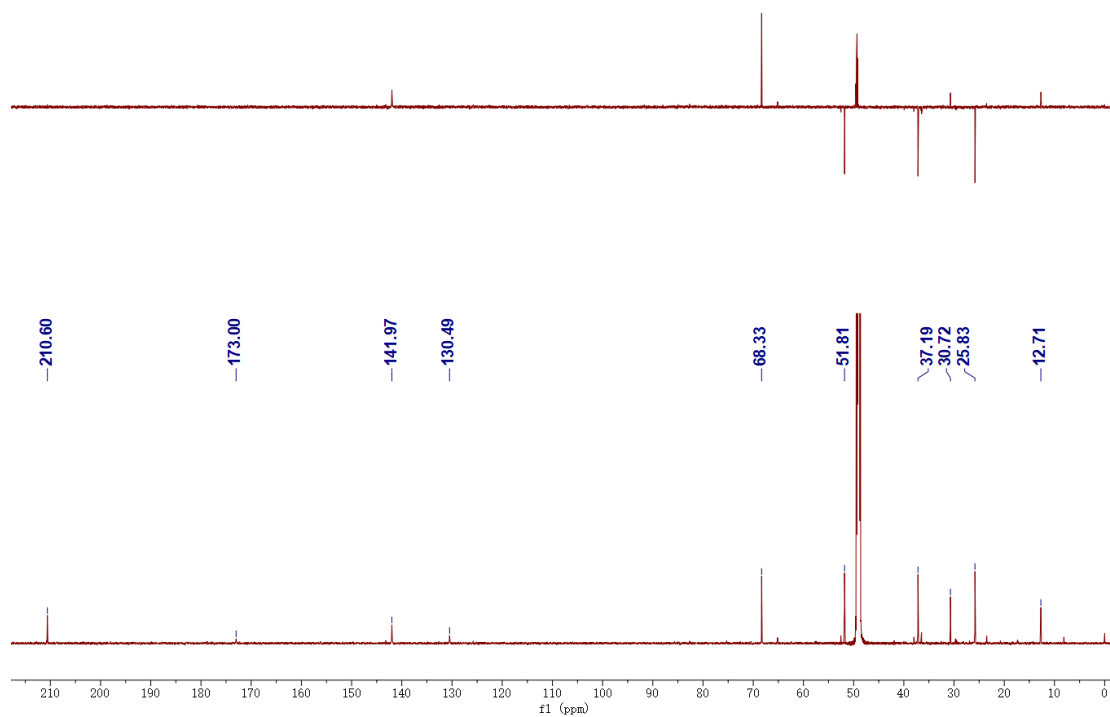

**Figure S30.** HSQC spectrum of compound **3**

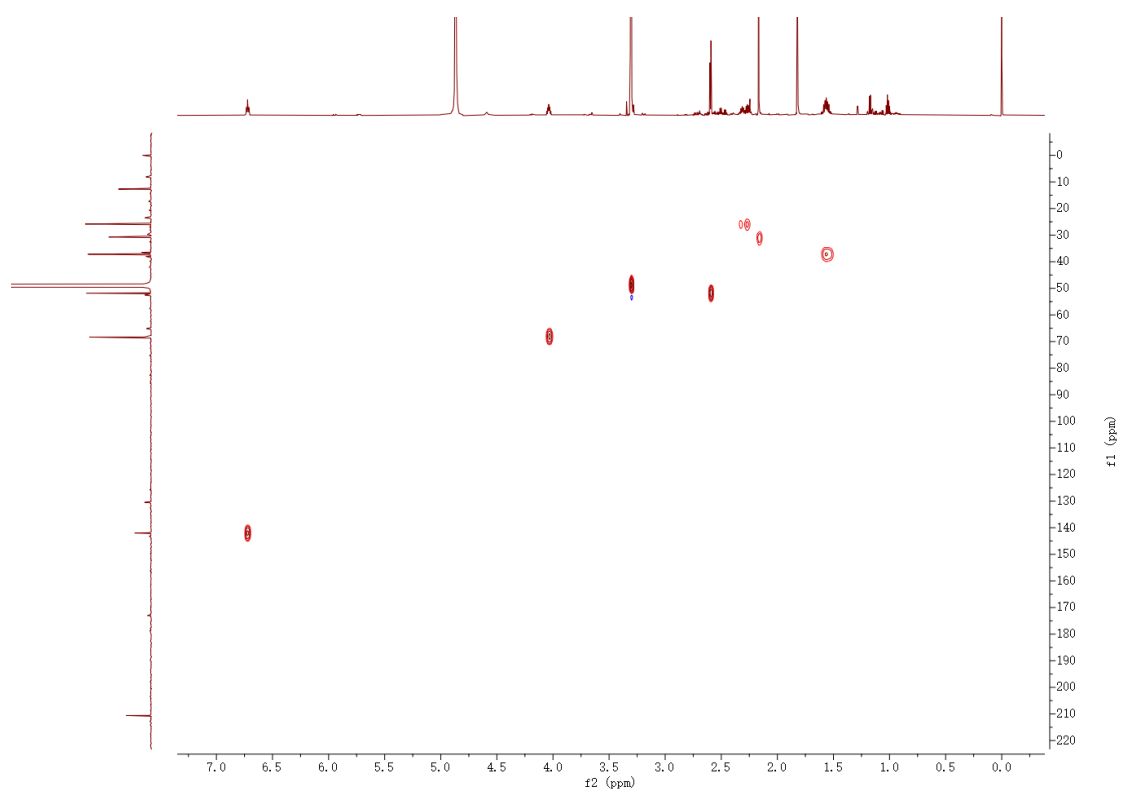

**Figure S31.** HMBC spectrum of compound **3**

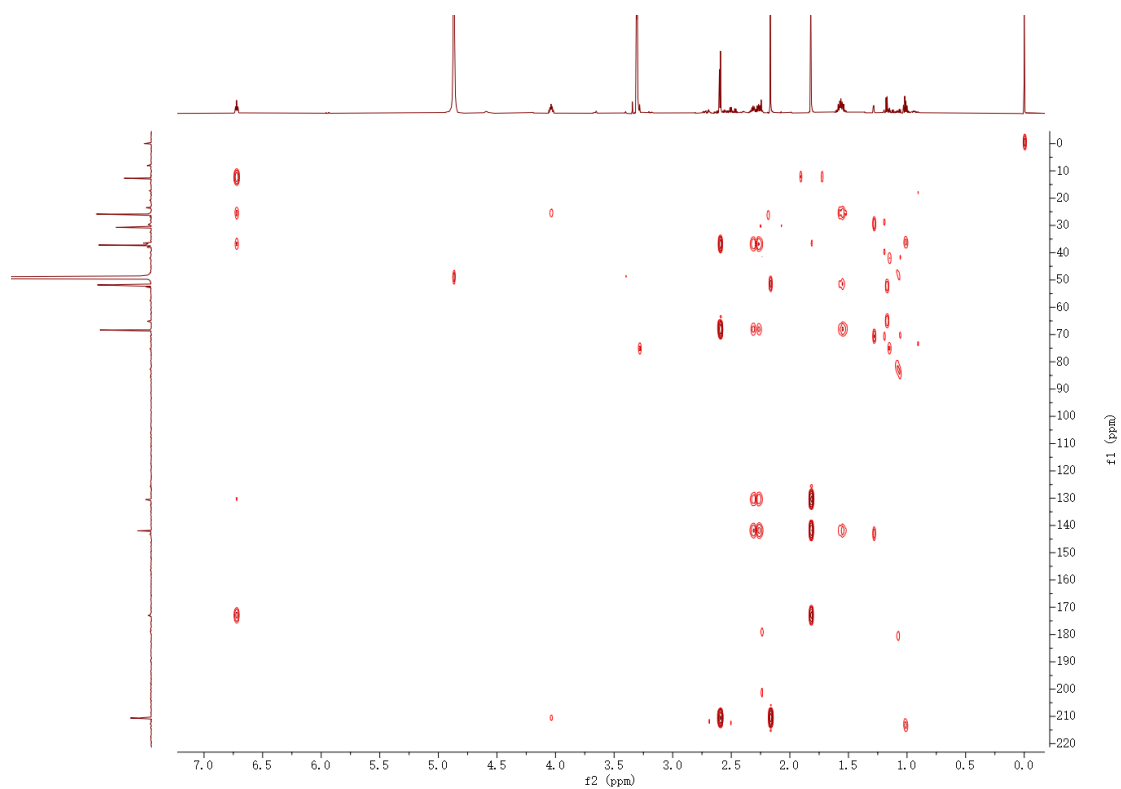

**Figure S32.**  $^1\text{H}$ - $^1\text{H}$  COSY spectrum of compound **3**

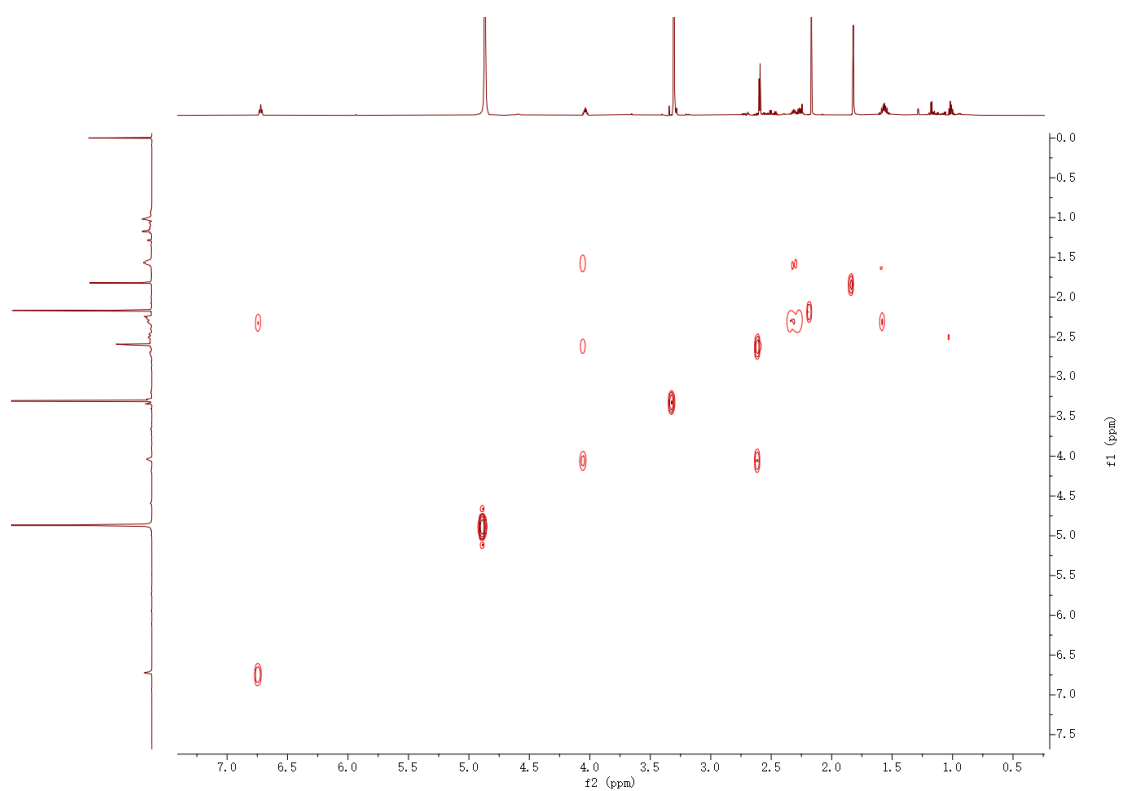

**Figure S33.** NOESY spectrum of compound **3**

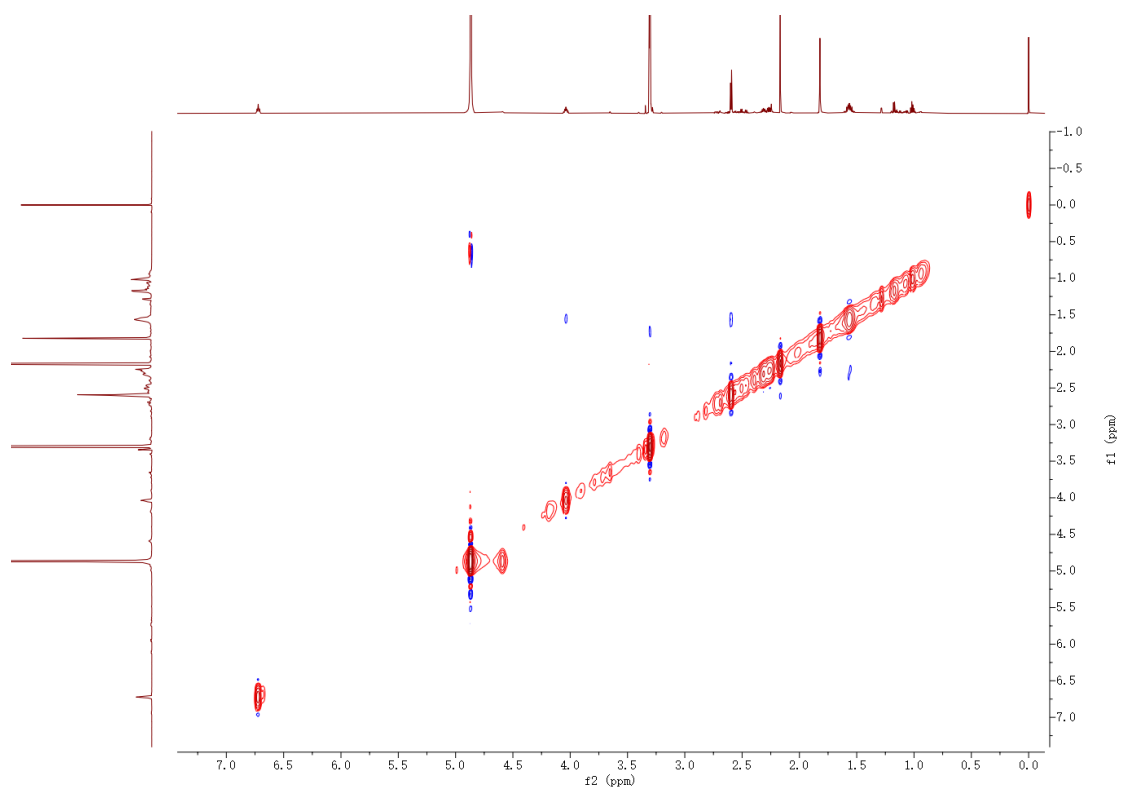

**Figure S34.** UV spectrum of compound **3**

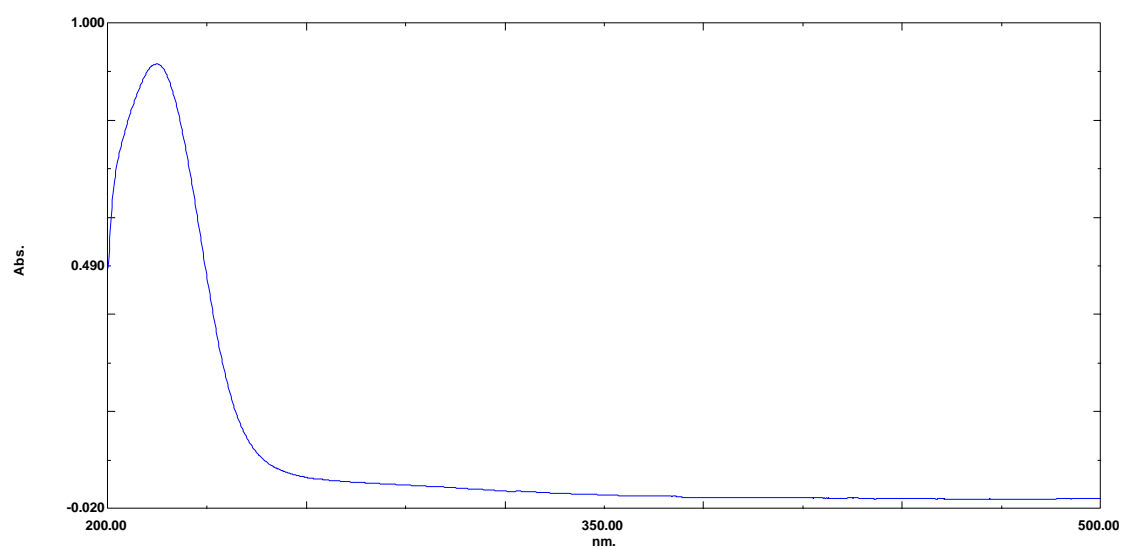

| No. | wavelength (nm) | Abs   |
|-----|-----------------|-------|
| 1   | 214.80          | 0.914 |

**Figure S35.** IR spectrum of compound **3**

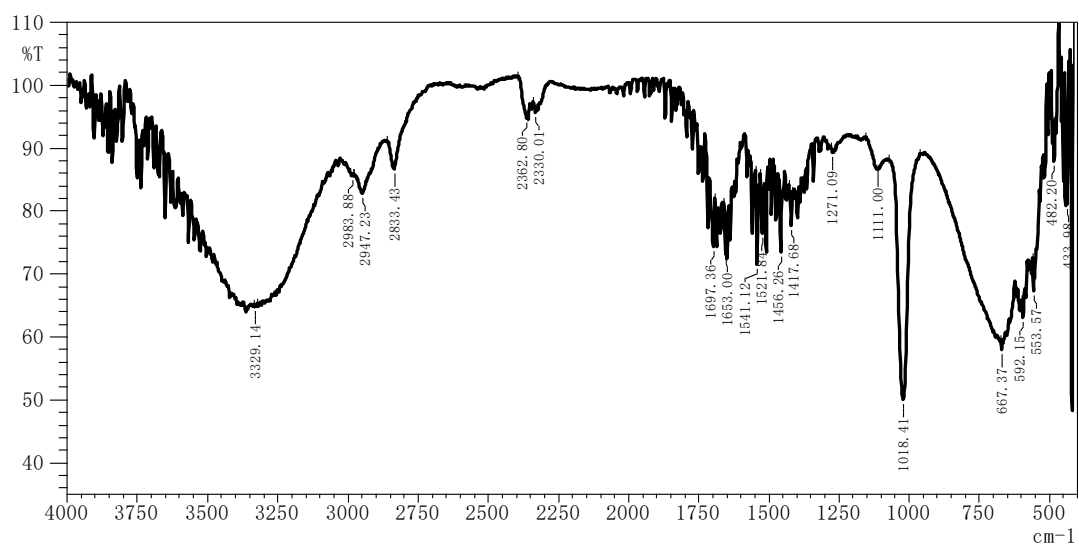

**Figure S36.** CD spectrum of compound **3a**

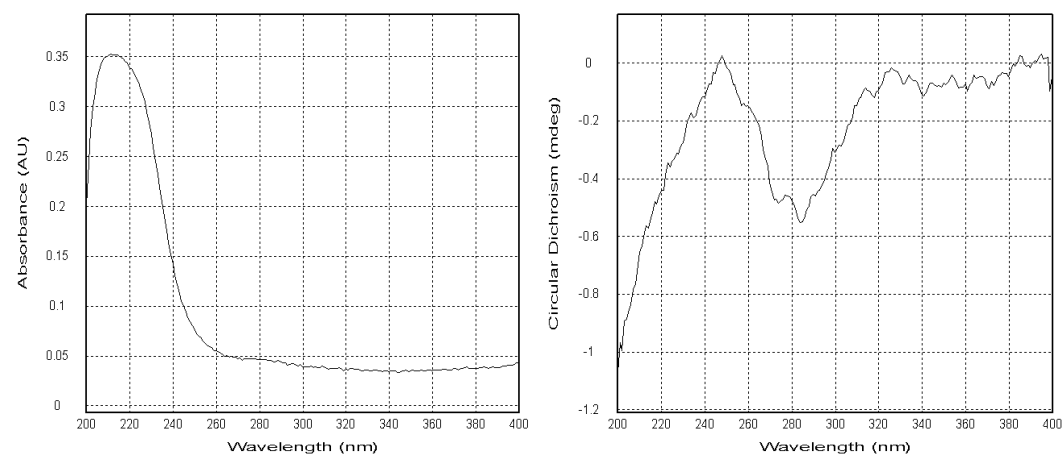

**Figure S37.** CD spectrum of compound **3b**

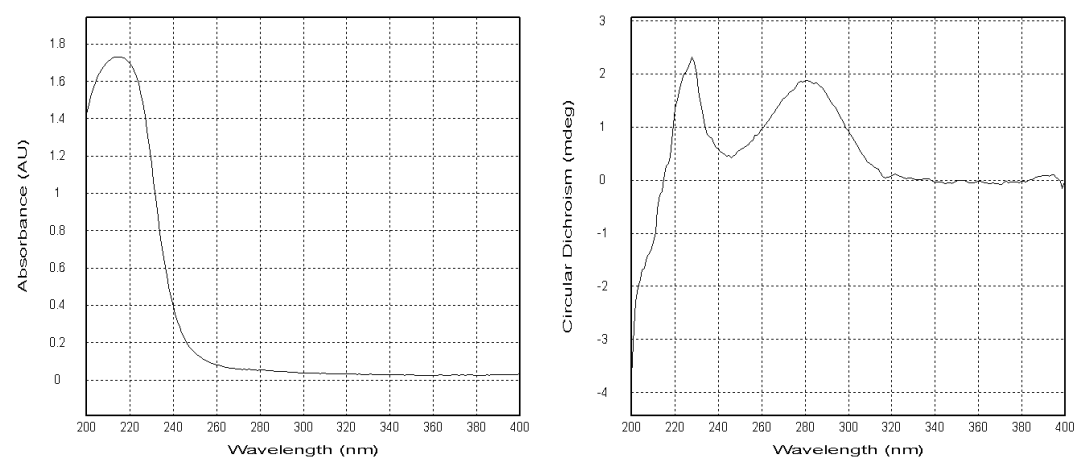

**Figure S38.** HRESIMS spectrum of compound **4**

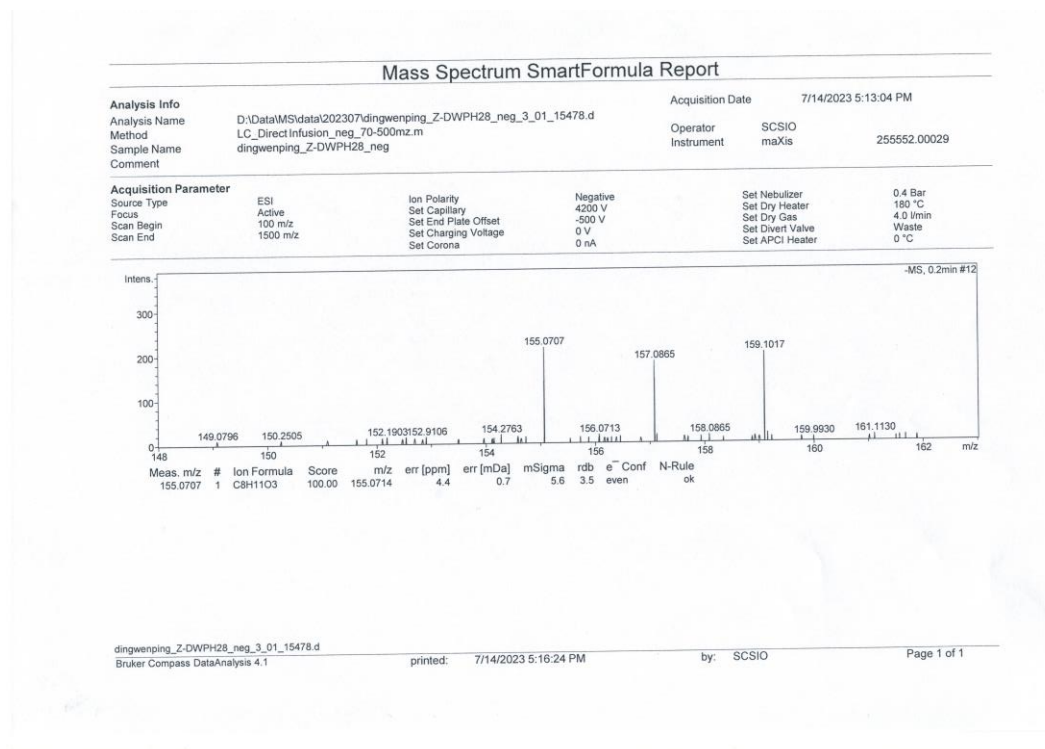

**Figure S39.**  $^1\text{H}$  NMR spectrum ( $\text{CD}_3\text{OD}$ , 500 MHz) of compound **4**

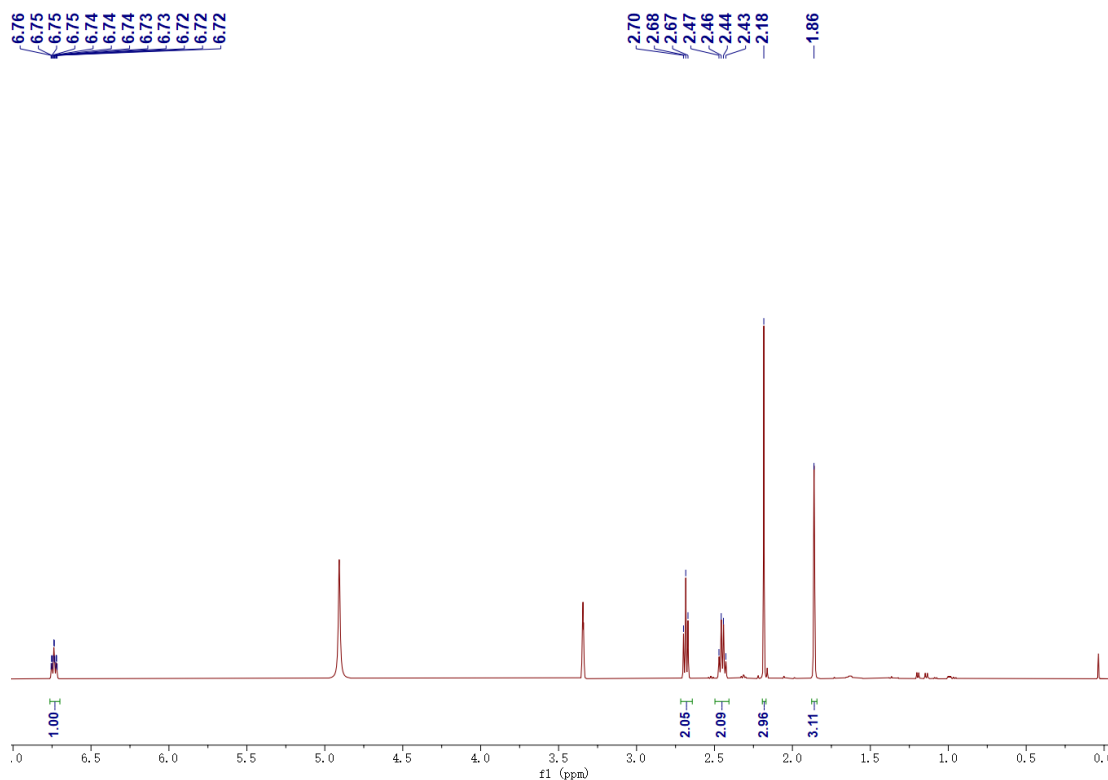

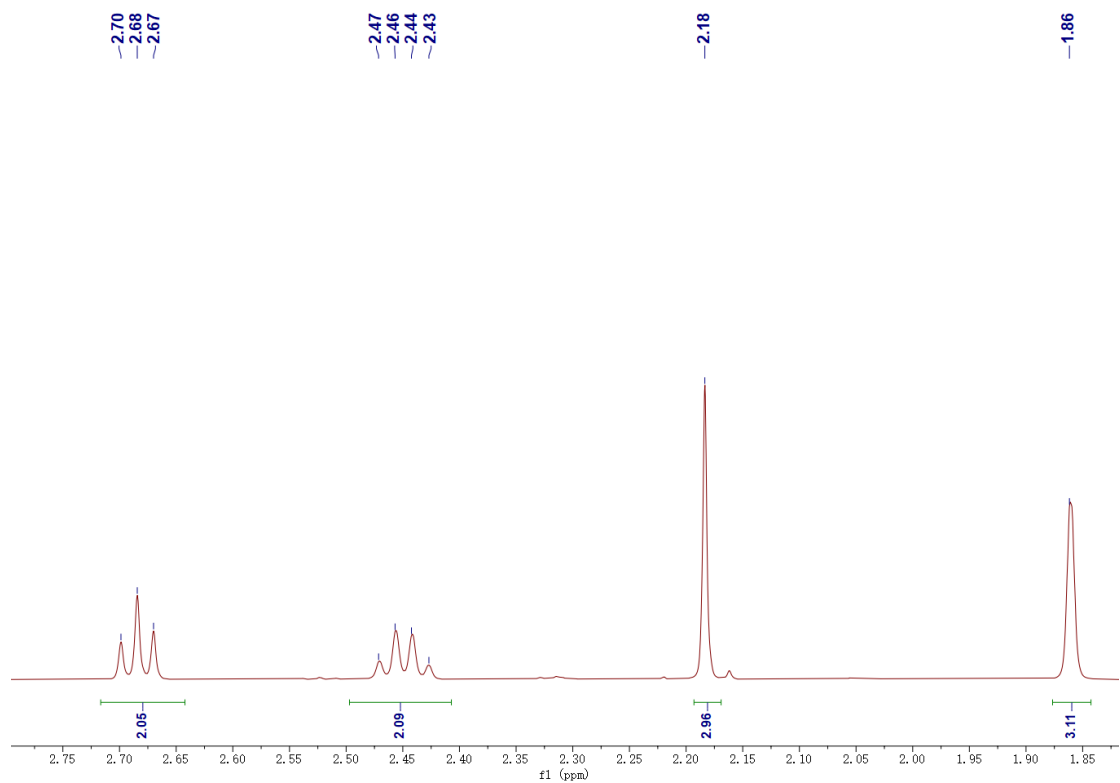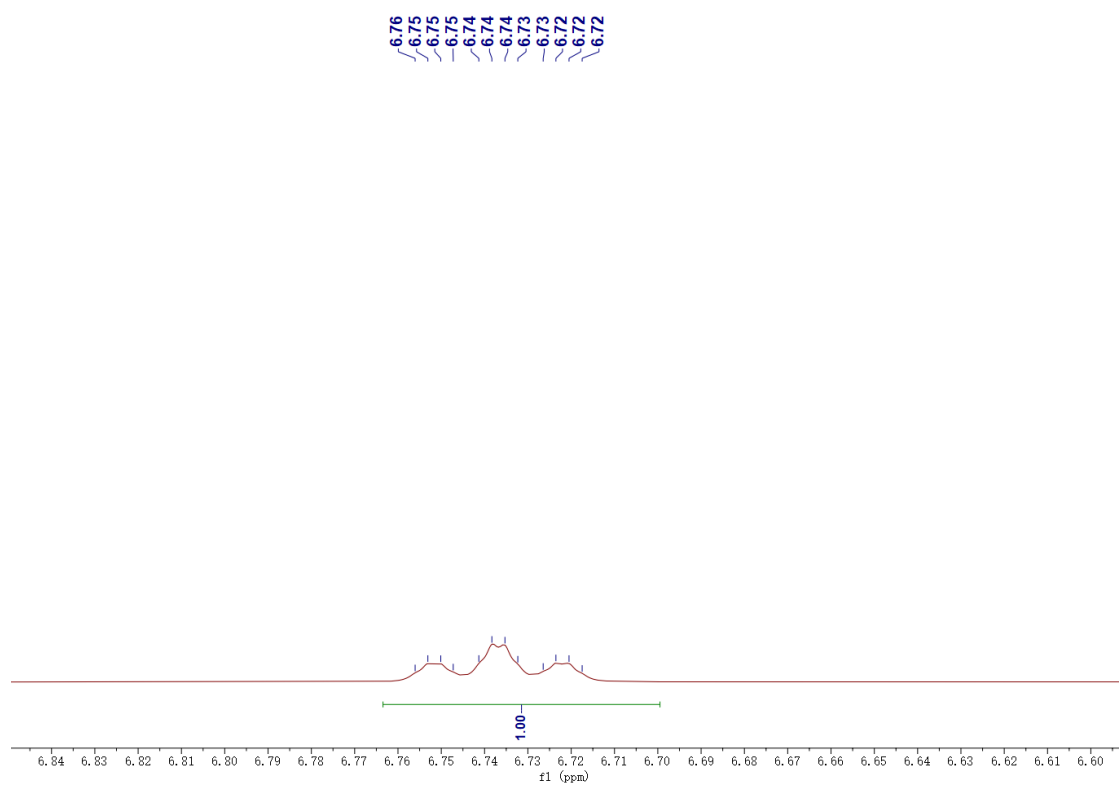

**Figure S40.**  $^{13}\text{C}$  NMR and DEPT spectra ( $\text{CD}_3\text{OD}$ , 126 MHz) of compound **4**

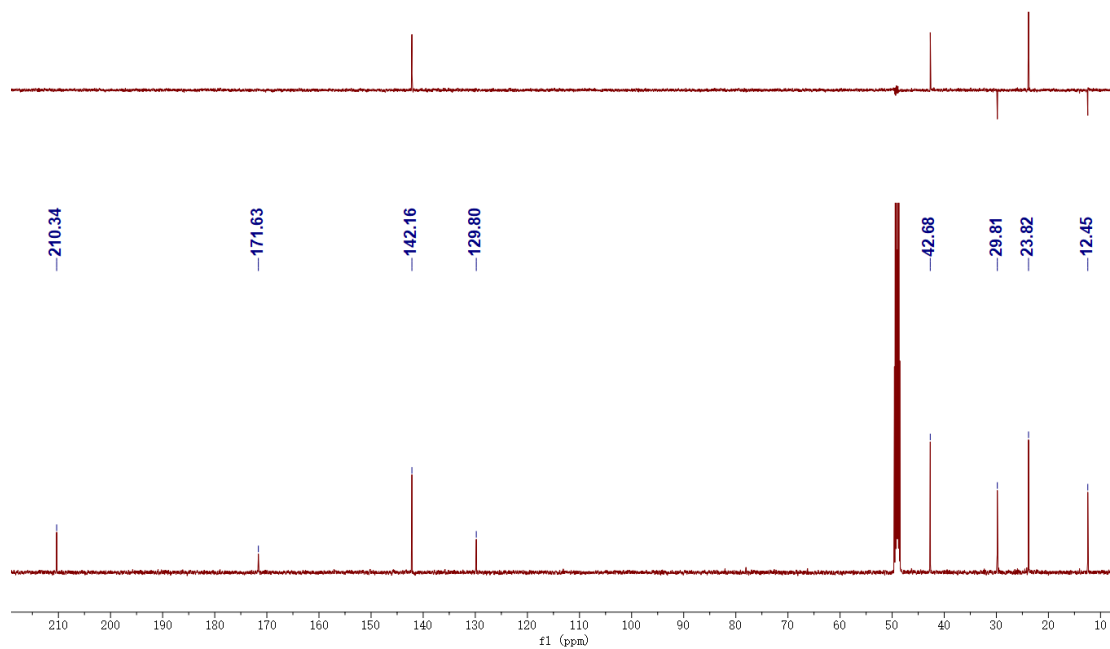

**Figure S41.** HSQC spectrum of compound **4**

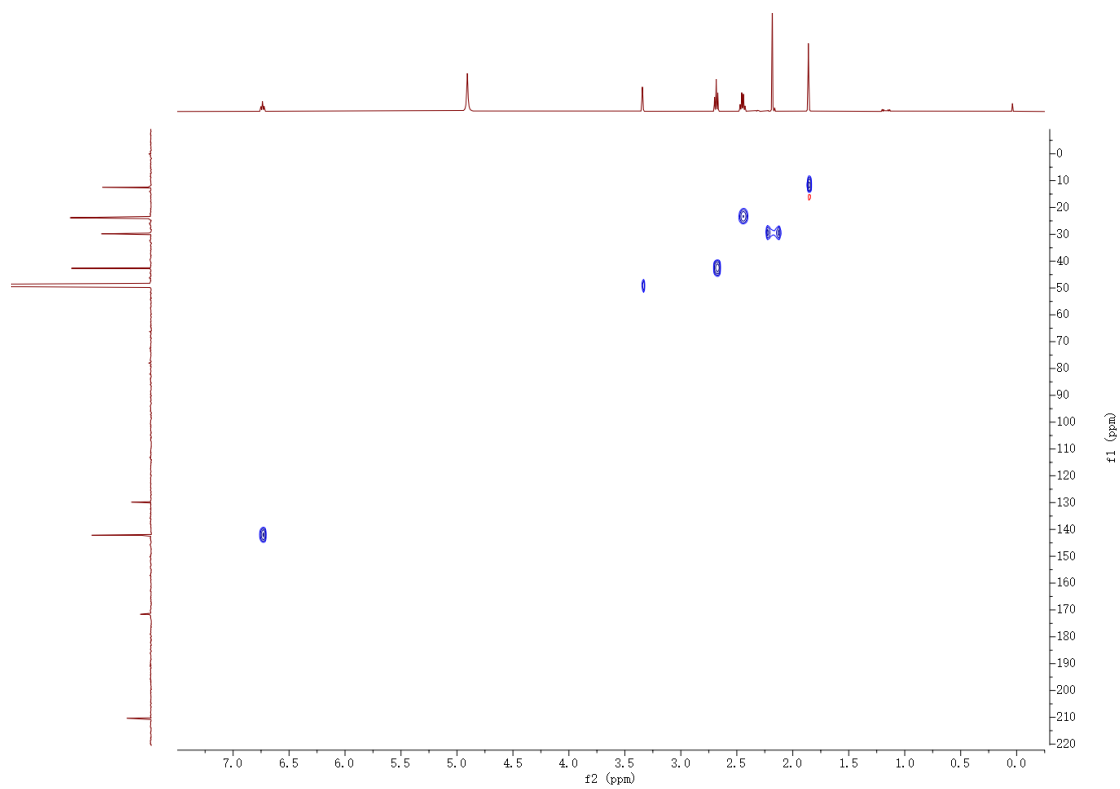

**Figure S42.** HMBC spectrum of compound **4**

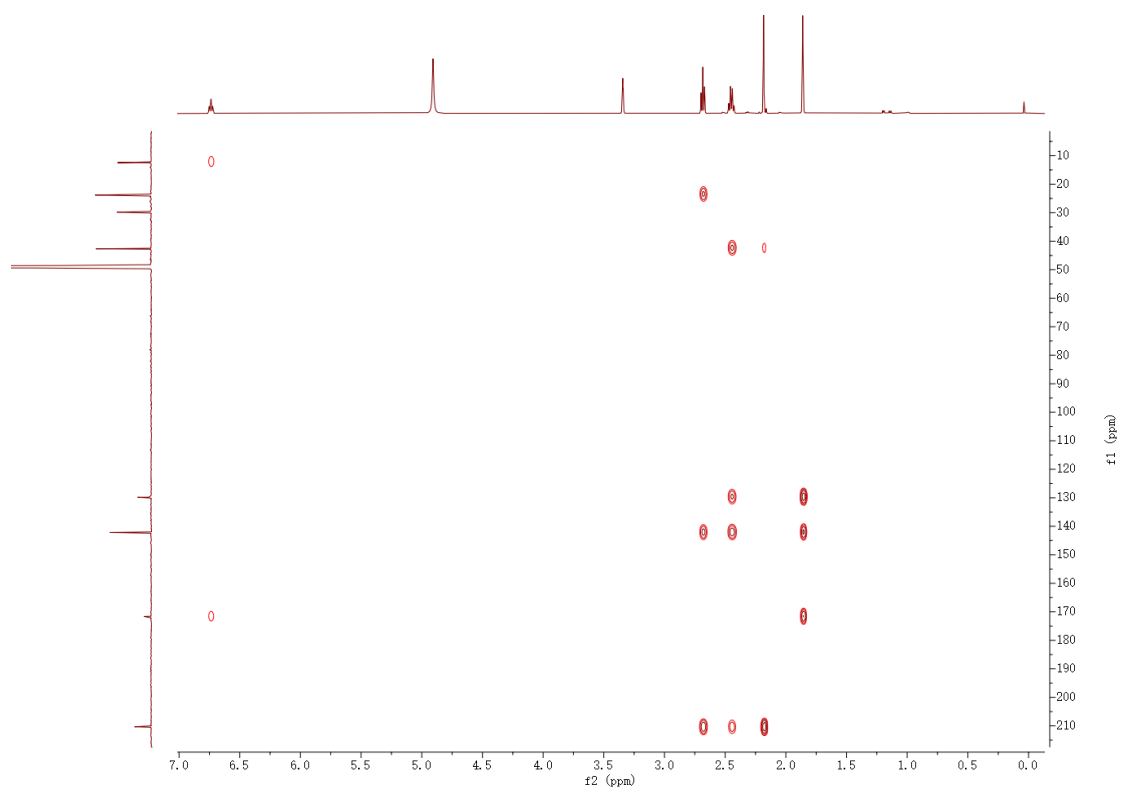

**Figure S43**  $^1\text{H}$ – $^1\text{H}$  COSY spectrum of compound **4**

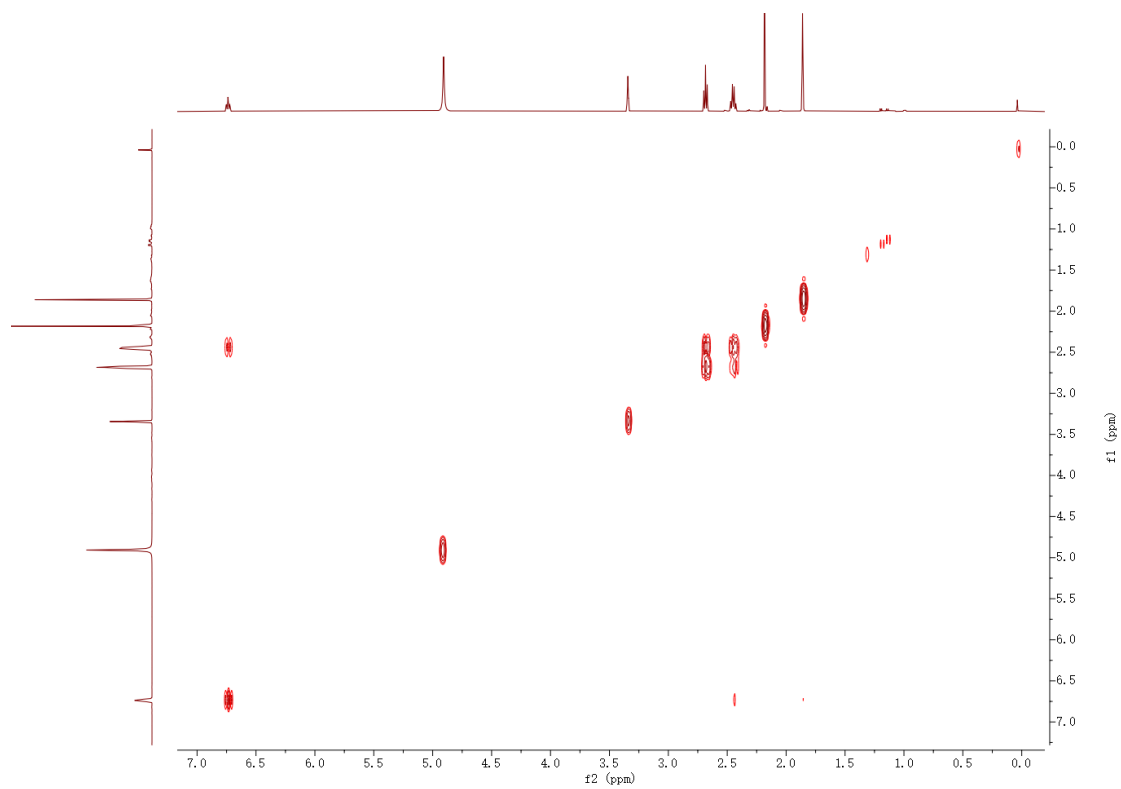

**Figure S44.** NOESY spectrum of compound **4**

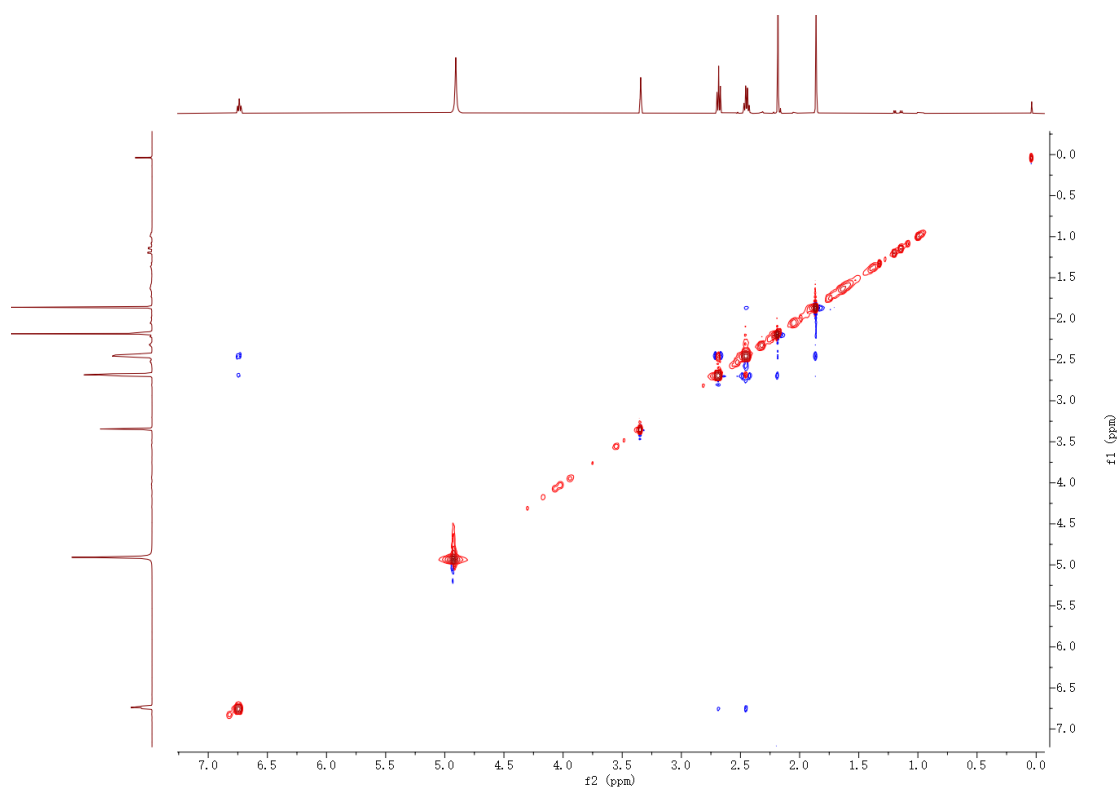

**Figure S45.** UV spectrum of compound **4**

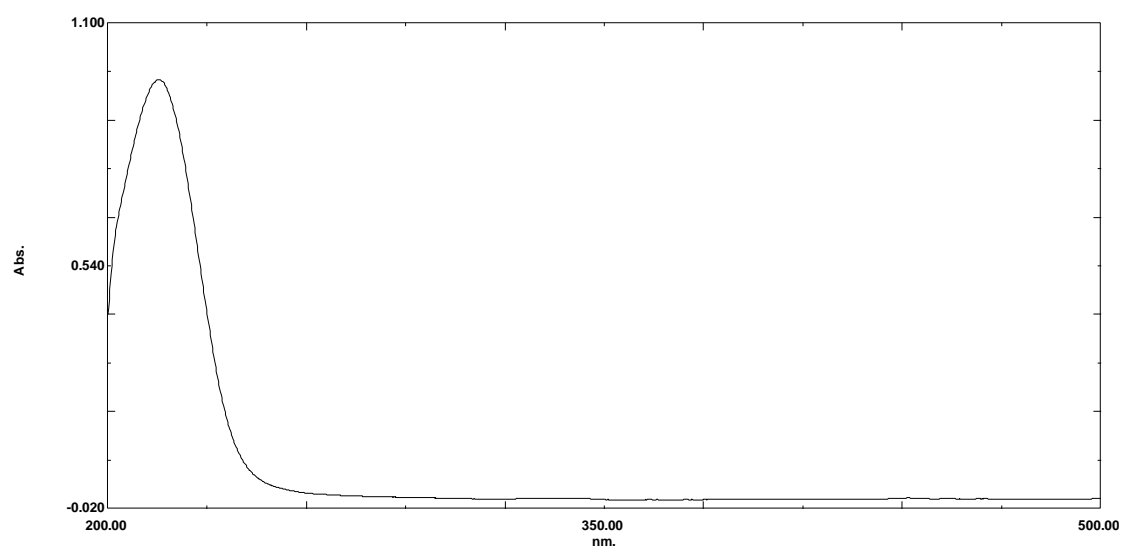

| No. | wavelength (nm) | Abs   |
|-----|-----------------|-------|
| 1   | 215.20          | 0.970 |

**Figure S46.** IR spectrum of compound **4**

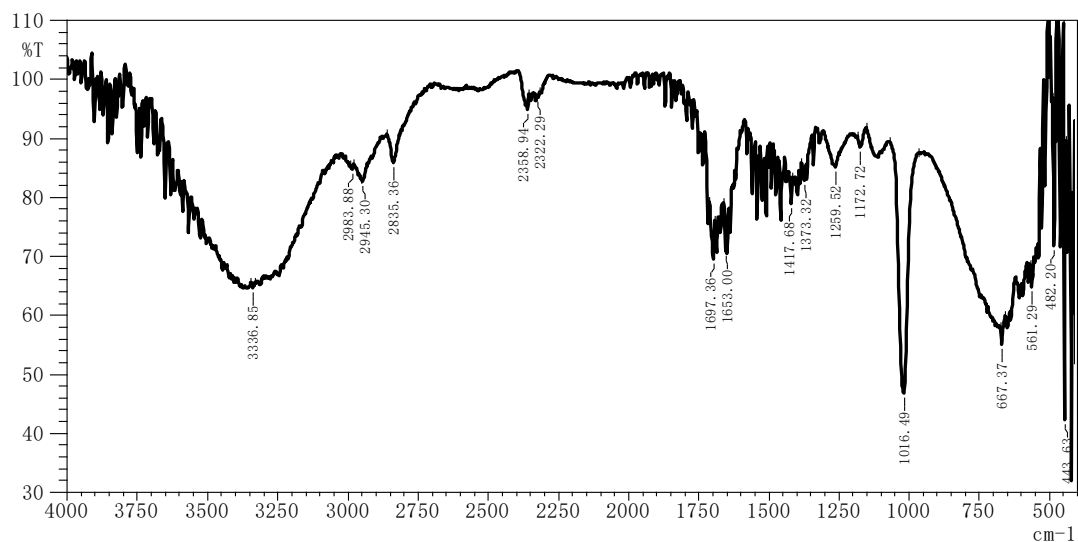

**Figure S47.** ESIMS spectrum of compound **5**

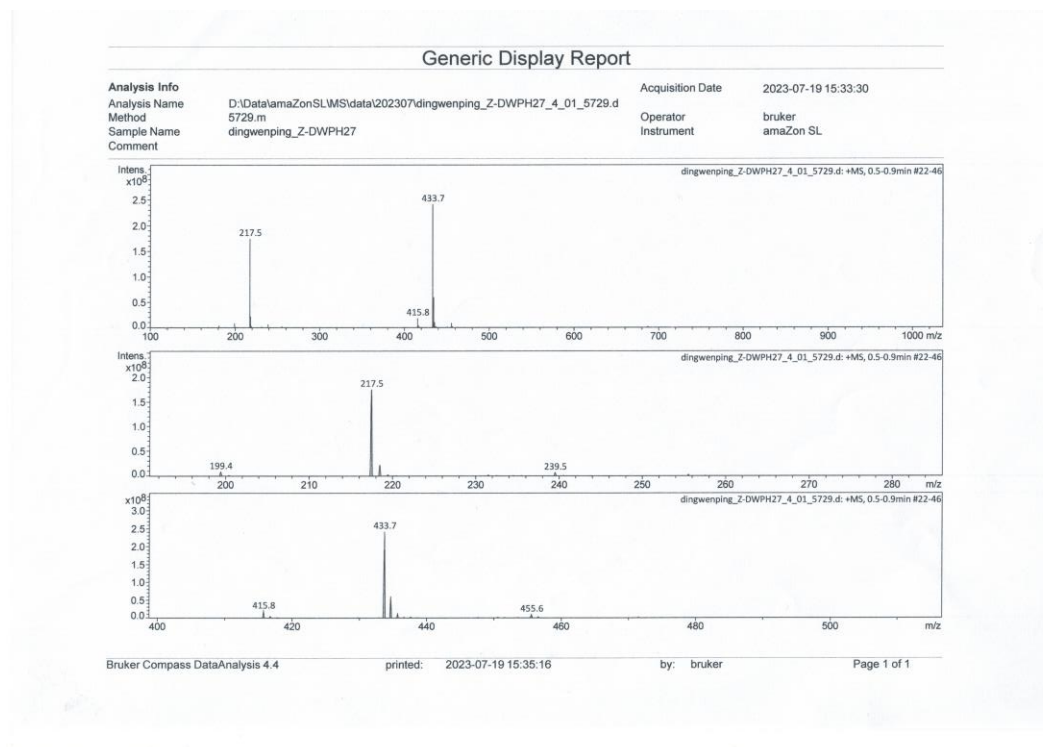

**Figure S48.**  $^1\text{H}$  NMR spectrum ( $\text{CDCl}_3$ , 500 MHz) of compound **5**

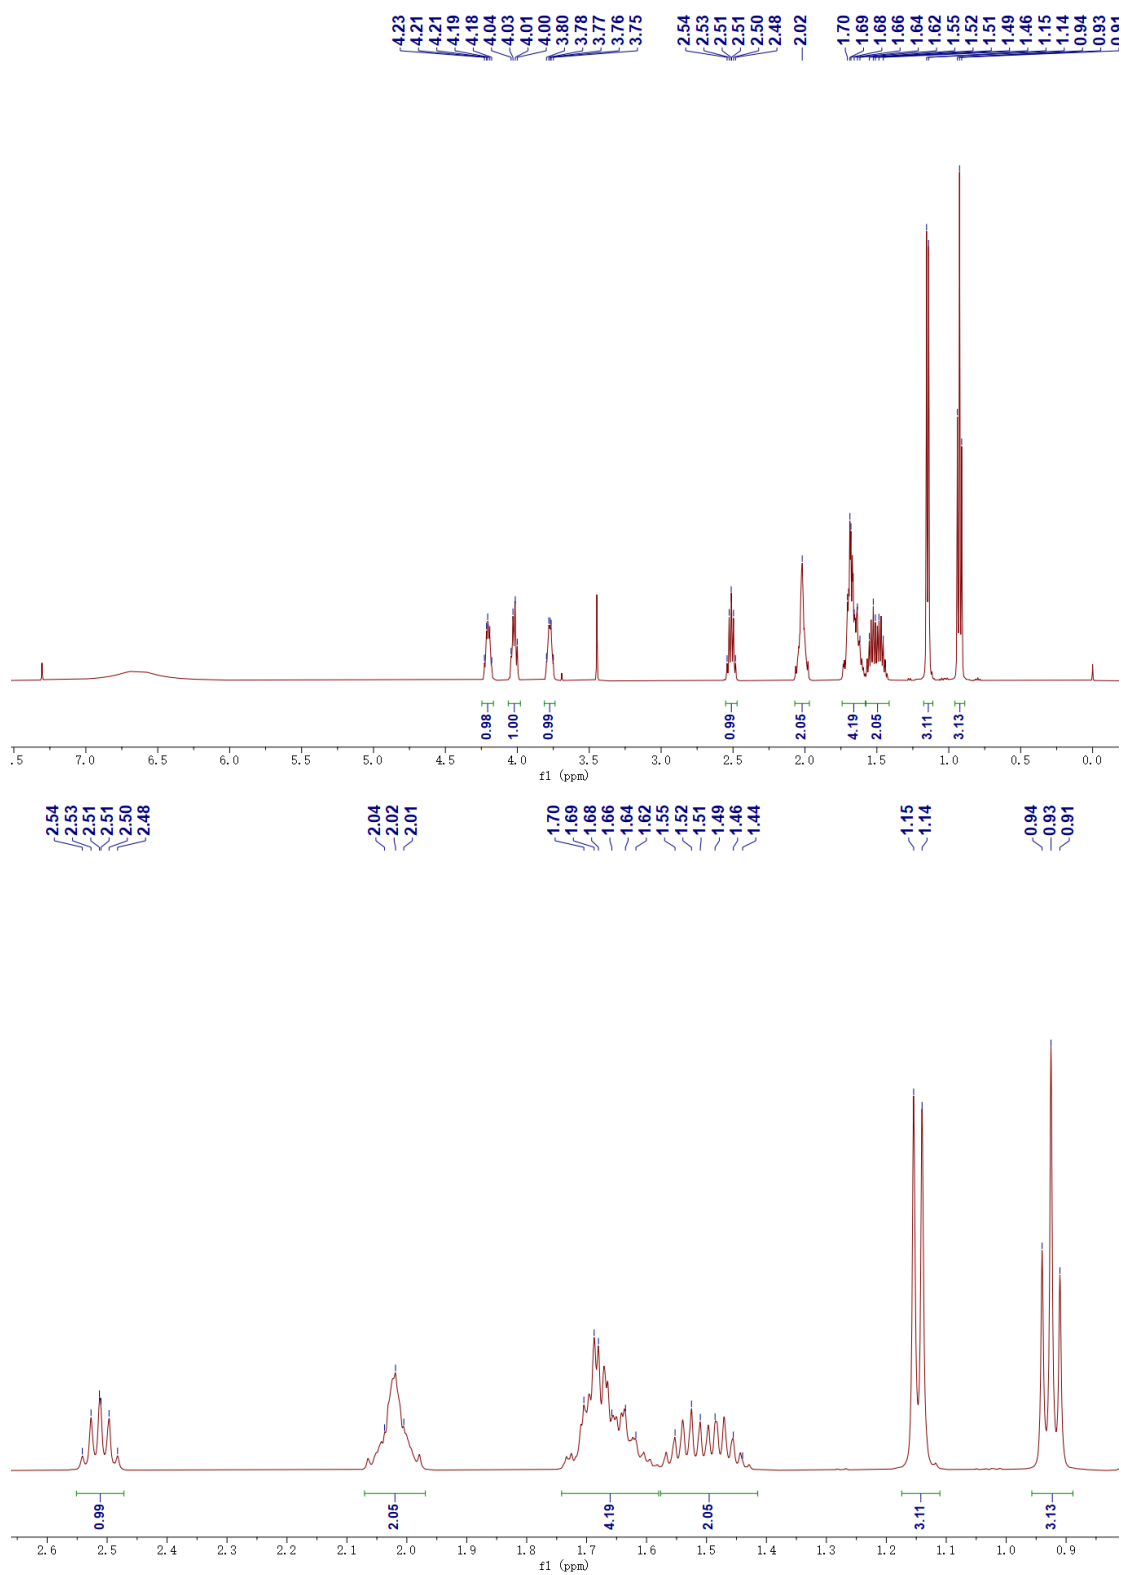

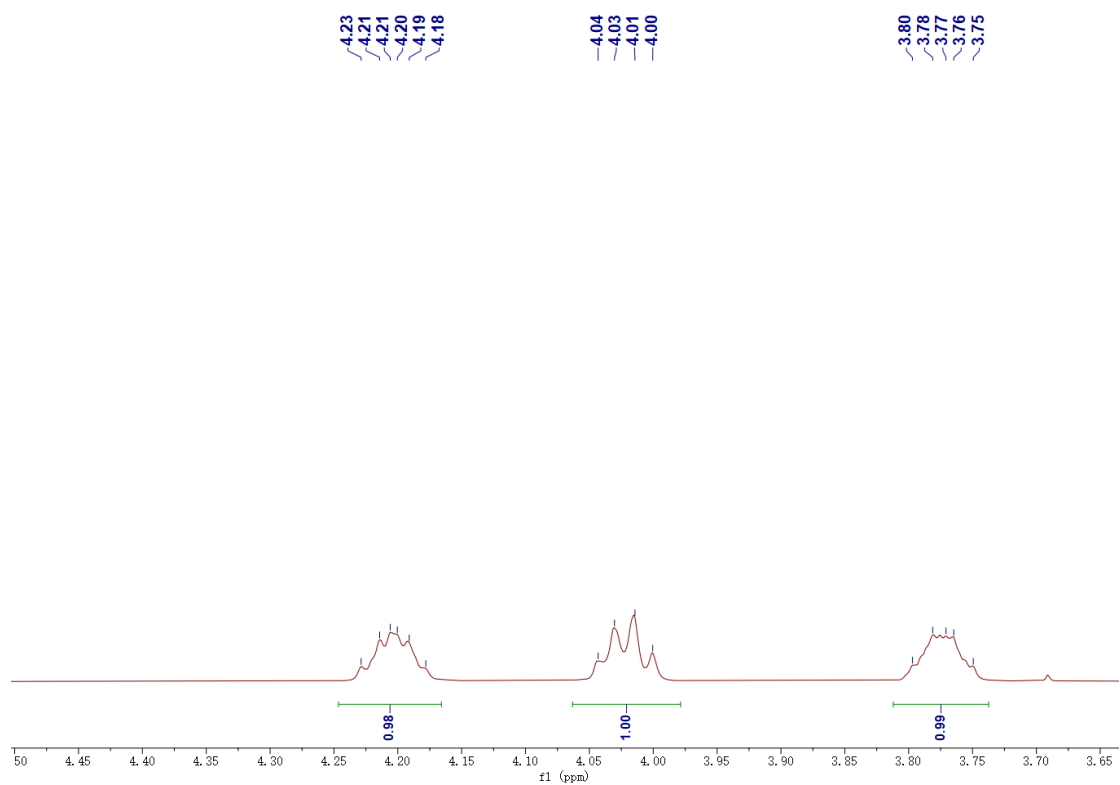

**Figure S49.**  $^{13}\text{C}$  NMR and DEPT spectra ( $\text{CDCl}_3$ , 126 MHz) of compound **5**

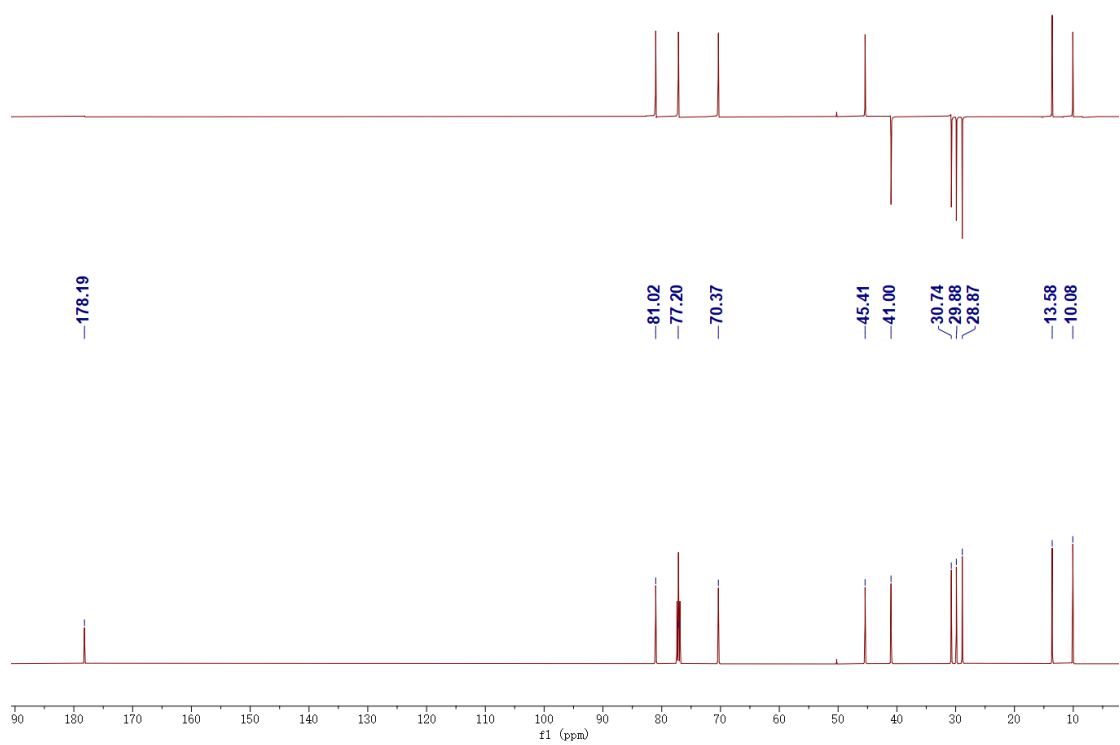

**Figure S50.** CD spectrum of compound **5**

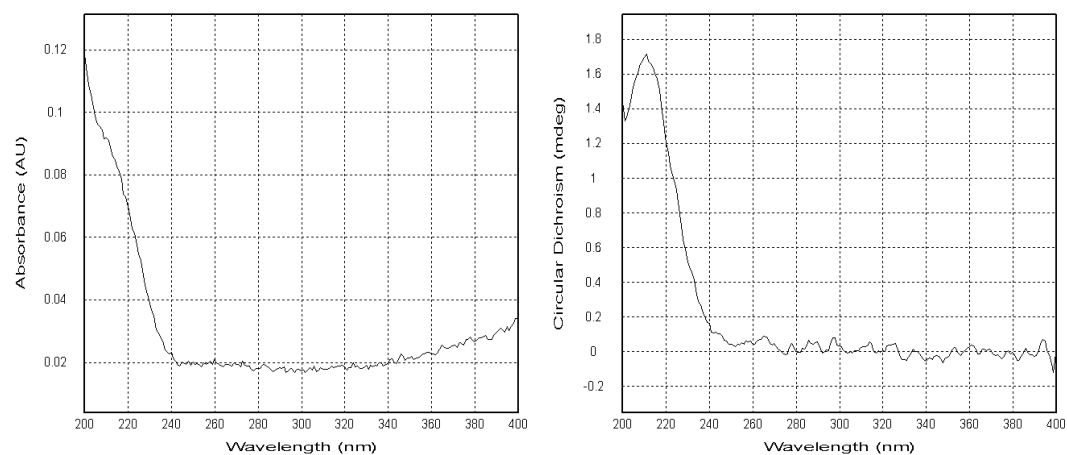

**Figure S51.** ESIMS spectrum of compound **6**

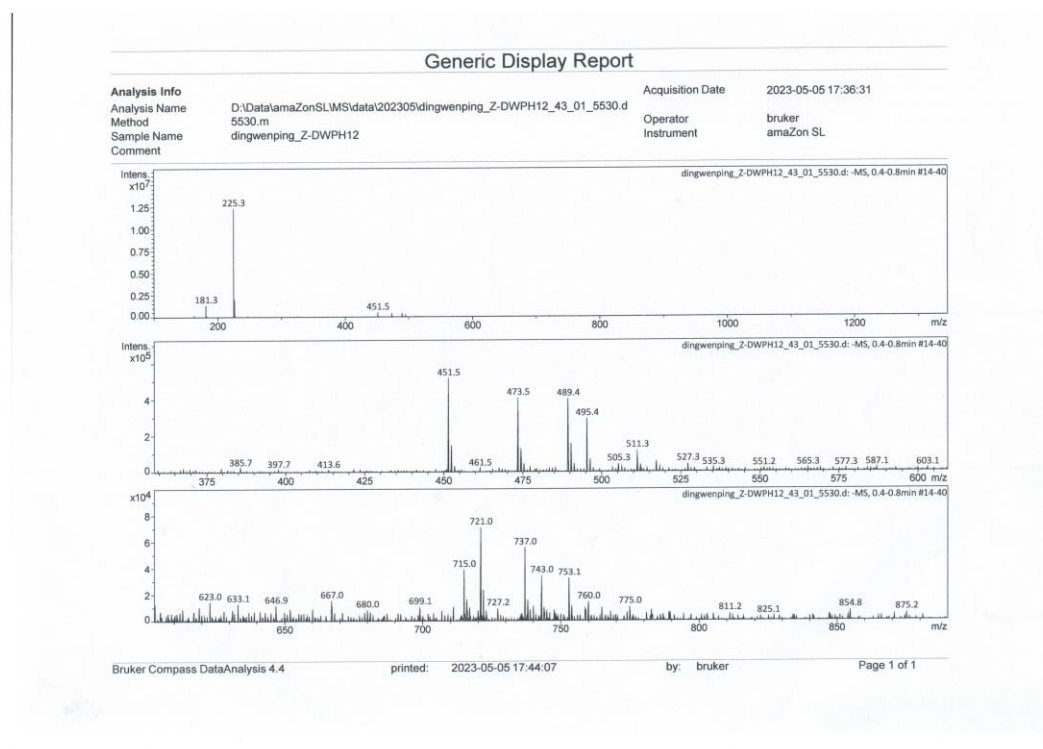

**Figure S52.**  $^1\text{H}$  NMR spectrum ( $\text{CD}_3\text{OD}$ , 700 MHz) of compound **6**

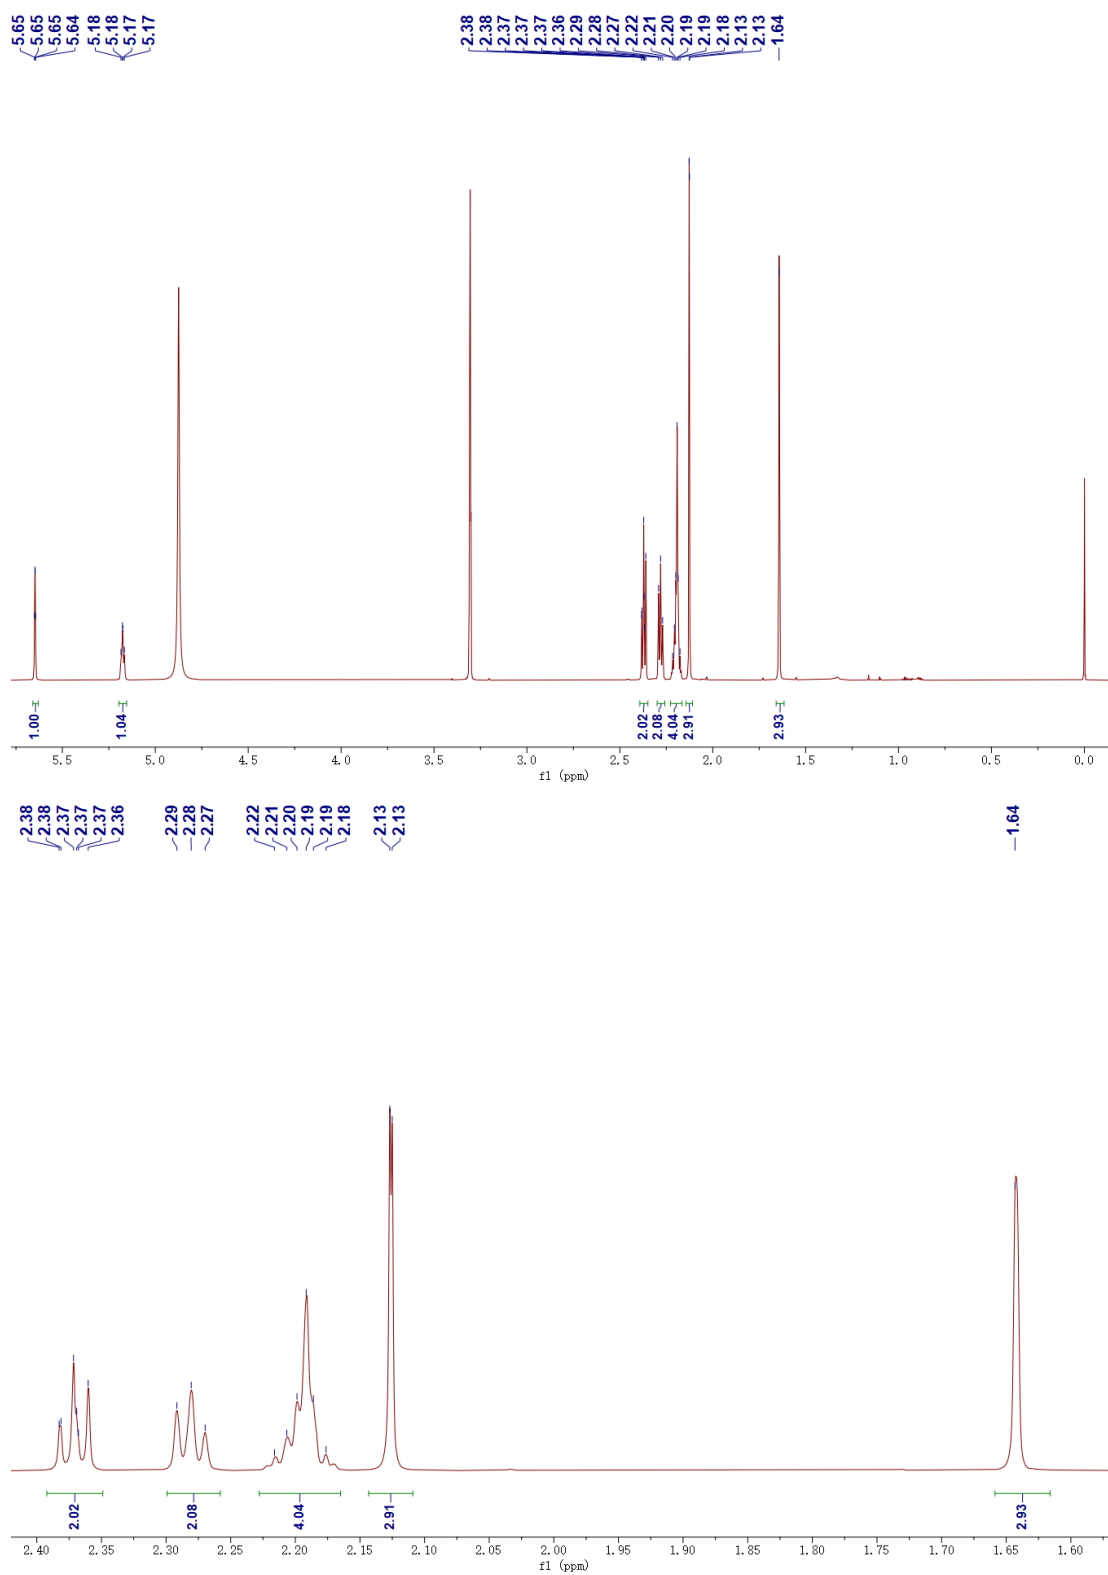

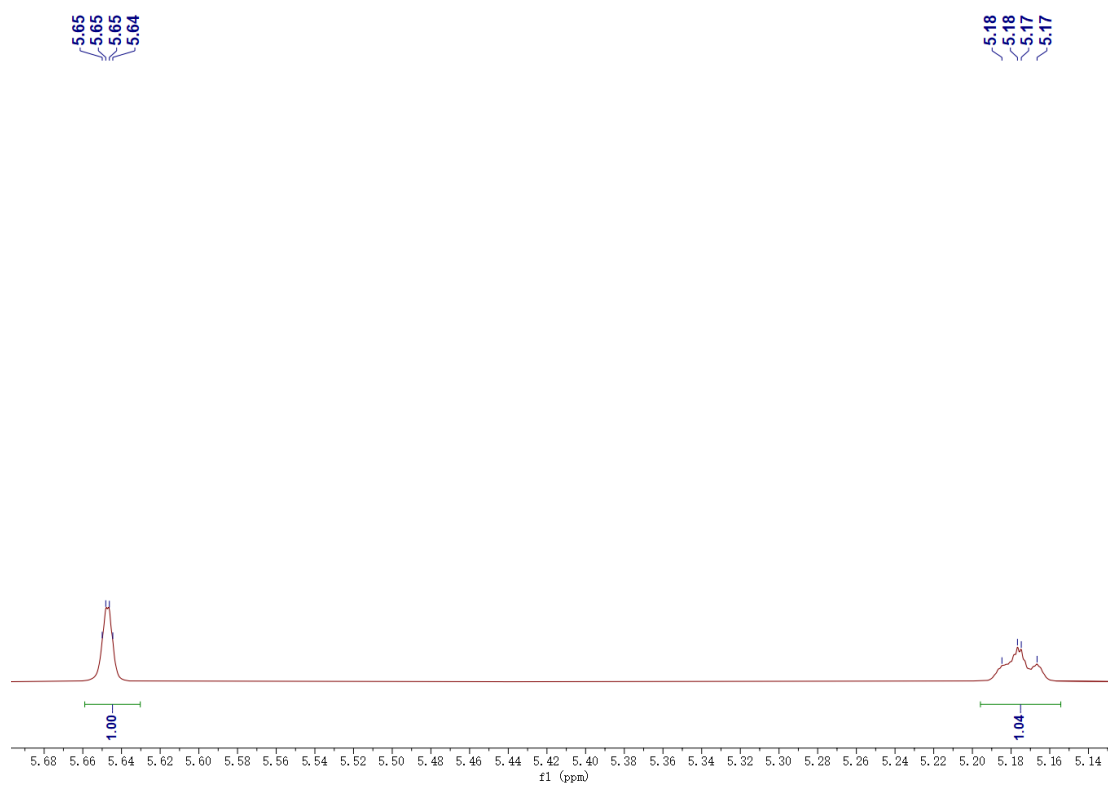

**Figure S53.** <sup>13</sup>C NMR and DEPT spectra (CD<sub>3</sub>OD, 176 MHz) of compound 6

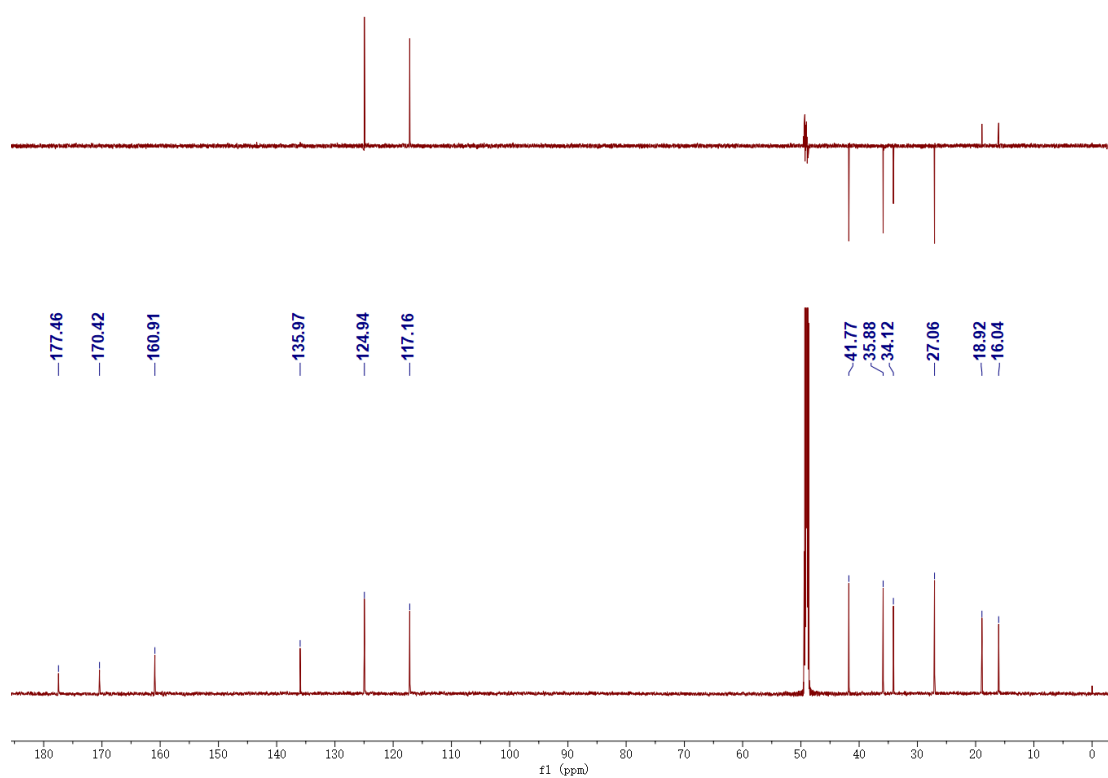

**Figure S54.** ESIMS spectrum of compound **7**

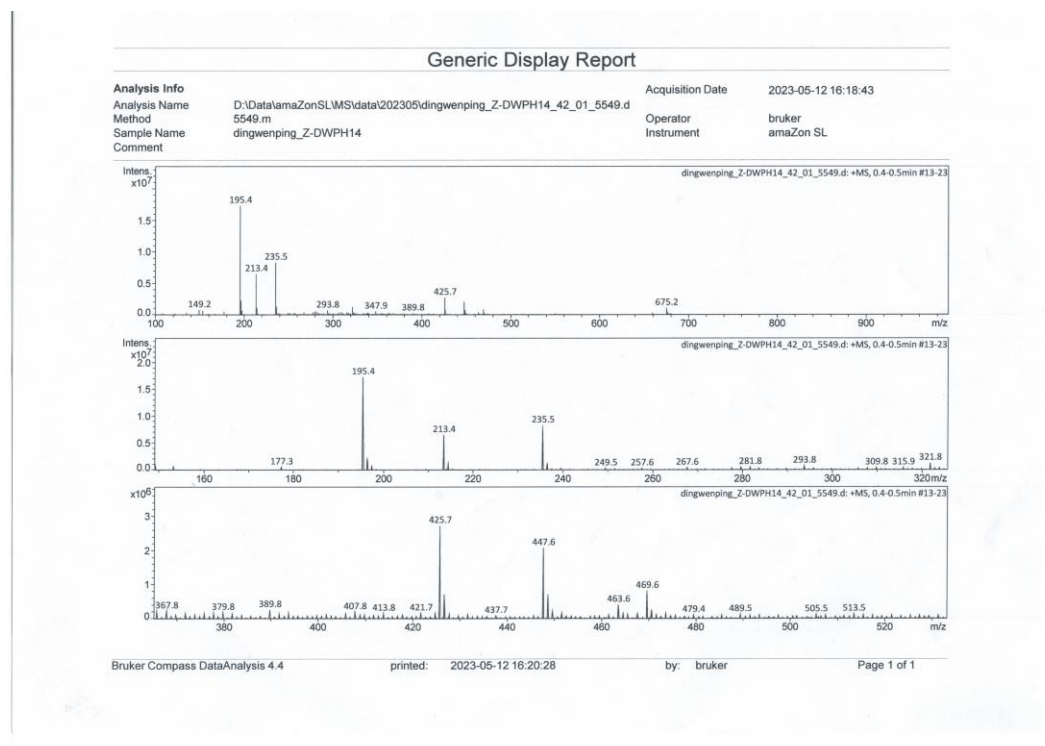

**Figure S55.**  $^1\text{H}$  NMR spectrum ( $\text{CD}_3\text{OD}$ , 700 MHz) of compound **7**

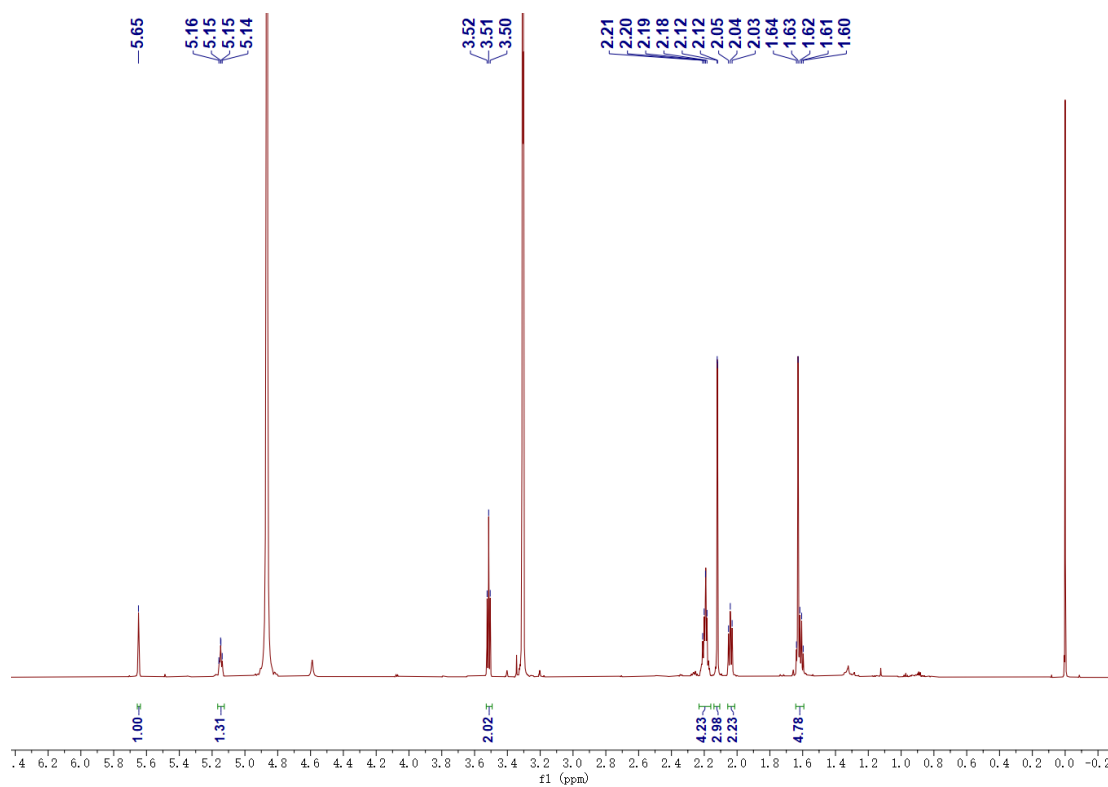

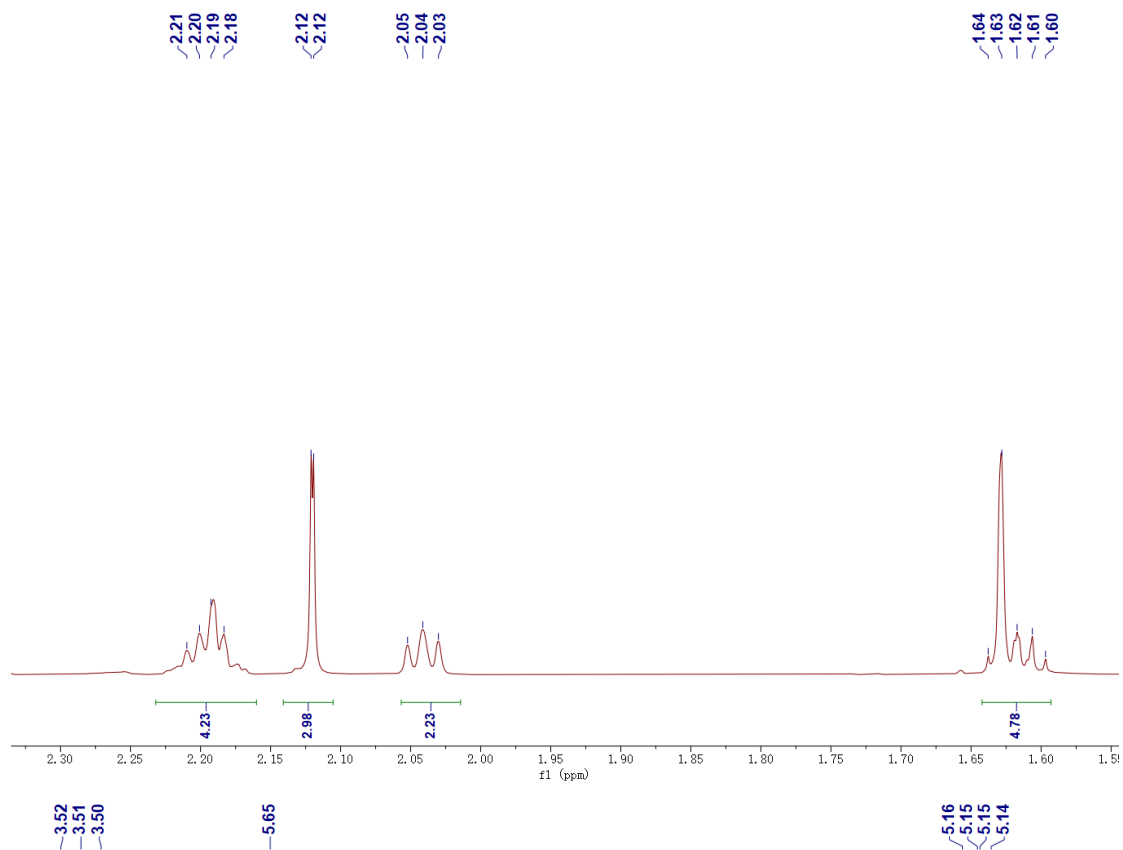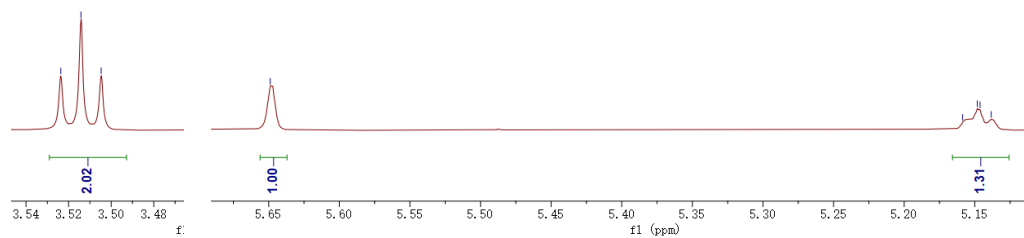

**Figure S56.**  $^{13}\text{C}$  NMR and DEPT spectra ( $\text{CD}_3\text{OD}$ , 176 MHz) of compound **7**

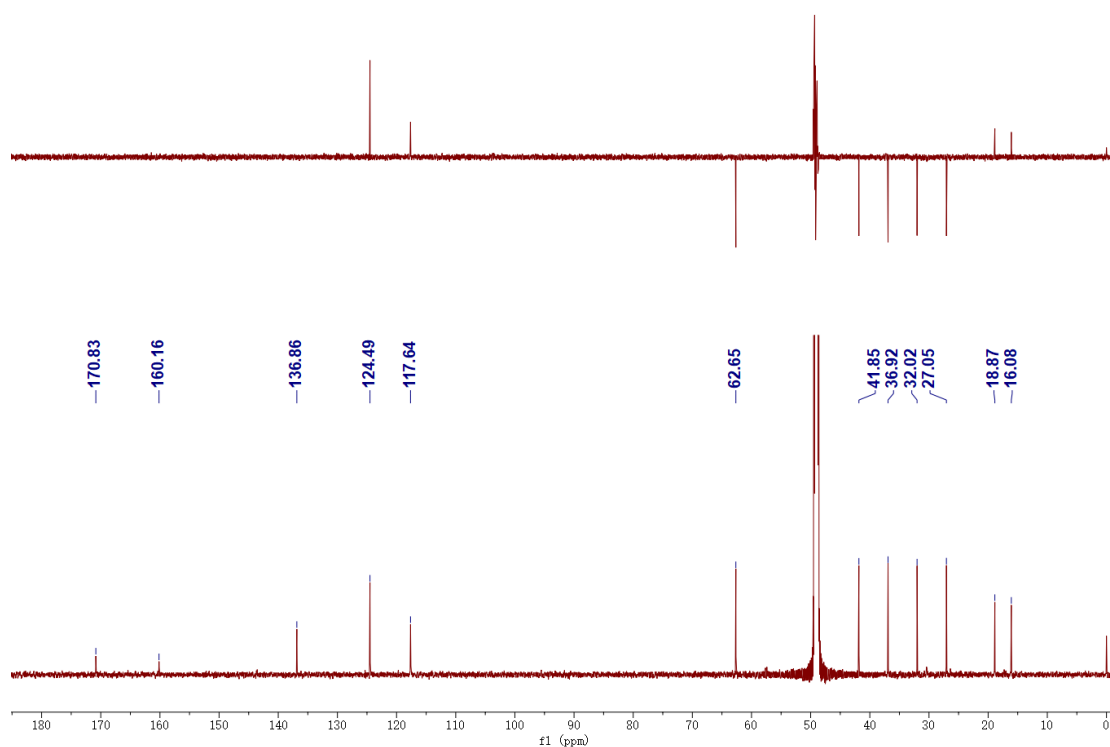

Calculated the specific rotations of **2a** and **2b**

**Figure S57.** The computational configurations of **2a** and **2b**

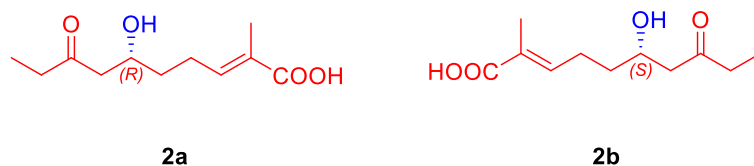

**Figure S58.** Optimized geometries of 6 dormant conformers of **2a** (**2a-1**, **2a-2**, **2a-3**, **2a-4**, **2a-6**, and **2a-7**, respectively) at the B3LYP-D3(BJ)/6-31G\* level of theory in methanol with the IEFPCM solvent

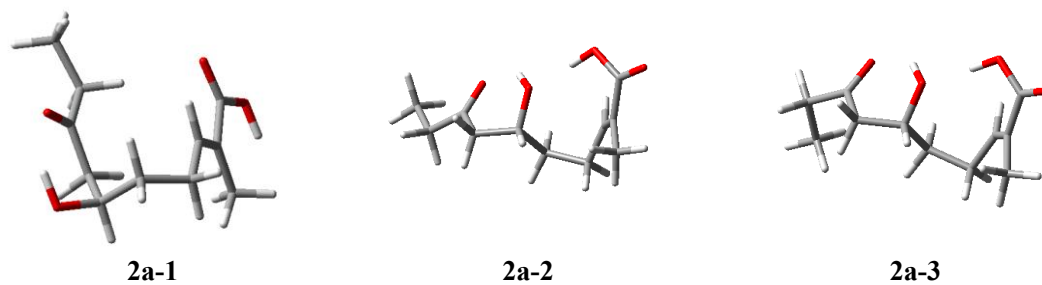

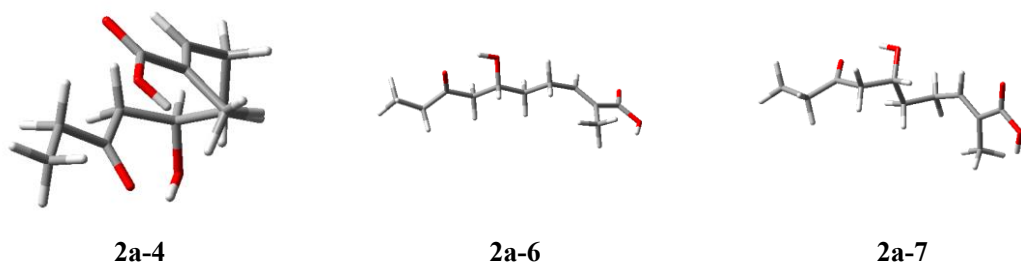

**Table S5.** Conformational analysis of the optimized **2a** at the B3LYP-D3(BJ)/6-31G\* of theory in methanol with the IEFPCM solvent

| Conformers  | $G$ (kcal/mol) <sup>a</sup> | $\Delta G$ (kcal/mol) <sup>b</sup> | Population <sup>c</sup> |
|-------------|-----------------------------|------------------------------------|-------------------------|
| <b>2a-1</b> | -458543.451338019           | 1.2211                             | 7.83%                   |
| <b>2a-2</b> | -458544.672471294           | 0.0000                             | 61.58%                  |
| <b>2a-3</b> | -458543.576839897           | 1.0956                             | 9.68%                   |
| <b>2a-4</b> | -458542.528899214           | 2.1436                             | 1.65%                   |
| <b>2a-6</b> | -458543.851689011           | 0.8208                             | 15.4%                   |
| <b>2a-7</b> | -458543.033416765           | 1.6391                             | 3.86%                   |

<sup>a</sup> The Gibbs free energy; <sup>b</sup> The relative Gibbs free energy; <sup>c</sup> The Boltzmann distribution of each conformer.

**Figure S59.** Optimized geometries of 6 dormant conformers of **2b** (**2b-1**, **2b-2**, **2b-3**, **2b-5**, **2b-6**, and **2b-7**, respectively) at the B3LYP-D3(BJ)/6-31G\* level of theory in methanol with the IEFPCM solvent

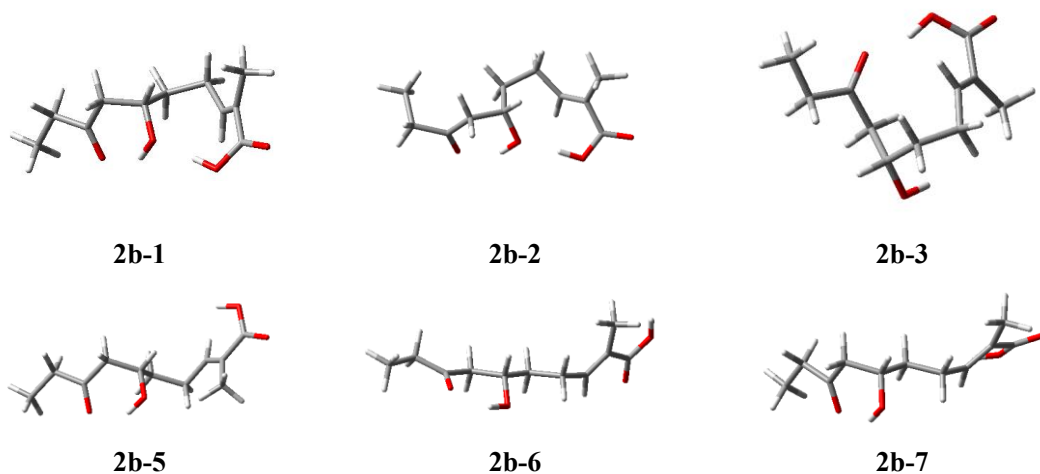

**Table S6.** Conformational analysis of the optimized **2b** at the B3LYP-D3(BJ)/6-31G\* of theory in methanol with the IEFPCM solvent

| Conformers  | $G$ (kcal/mol) <sup>a</sup> | $\Delta G$ (kcal/mol) <sup>b</sup> | Population <sup>c</sup> |
|-------------|-----------------------------|------------------------------------|-------------------------|
| <b>2b-1</b> | -458544.675608841           | 0.0000                             | 44.58%                  |
| <b>2b-2</b> | -458543.576839897           | 1.0988                             | 6.97%                   |

|             |                   |        |        |
|-------------|-------------------|--------|--------|
| <b>2b-3</b> | -458544.363109164 | 0.3125 | 26.3%  |
| <b>2b-5</b> | -458543.686654041 | 0.9890 | 8.39%  |
| <b>2b-6</b> | -458543.849178973 | 0.8264 | 11.04% |
| <b>2b-7</b> | -458543.018984049 | 1.6566 | 2.72%  |

---

<sup>a</sup> The Gibbs free energy; <sup>b</sup> The relative Gibbs free energy; <sup>c</sup> The Boltzmann distribution of each conformer.
